# 1 Restructuring of genomic provinces of surface ocean 2 plankton under climate change

3 Paul Frémont<sup>1,2\*</sup>, Marion Gehlen<sup>3\*</sup>, Mathieu Vrac<sup>3</sup>, Jade Leconte<sup>1,2</sup>, Patrick Wincker<sup>1,2</sup>,  
4 Daniele Iudicone<sup>4</sup>, Olivier Jaillon<sup>1,2\*</sup>

5 <sup>1</sup>Génomique Métabolique, Genoscope, Institut François Jacob, CEA, CNRS, Université d'Evry, Université Paris-  
6 Saclay, 91057 Evry, France. <sup>2</sup>Research Federation for the study of Global Ocean Systems Ecology and  
7 Evolution, FR2022/Tara Oceans, Paris, France. <sup>3</sup>LSCE-IPSL, CEA/CNRS/Université Paris-Saclay, Gif-sur-  
8 Yvette, France. <sup>4</sup>Stazione Zoologica Anton Dorn. Villa Comunale, 80121, Naples, Italy.

9 \*Corresponding authors: pfremont@genoscope.cns.fr; marion.gehlen@lsce.ipsl.fr; ojaillon@genoscope.cns.fr  
10

## 11 Abstract

12 **The impact of climate change on diversity, functioning and biogeography of marine**  
13 **plankton is a major unresolved scientific issue. Here, niche theory is applied on**  
14 **plankton metagenomes sampled during the *Tara Oceans* expedition to derive pan-**  
15 **ocean geographical structuring in climatic provinces with signature genomes for 6**  
16 **size fractions, from viruses to meso-zooplankton. Assuming a high warming scenario**  
17 **(RCP8.5), the identified tropical provinces would expand and temperate provinces**  
18 **would shrink. Poleward shifts are projected for 96% of provinces in five major**  
19 **basins leading to their reorganization over ~50% of the surface ocean south of 60°N,**  
20 **of which 3% correspond to novel assemblages of provinces. Sea surface temperature**  
21 **is identified as the main driver and accounts only for ~51 % of the changes followed**  
22 **by phosphate (11%) and salinity (10.3%). These results demonstrate the potential**  
23 **of integration of genomics with physico-chemical data for higher scale modeling and**  
24 **understanding of ocean ecosystems.**

25 Planktonic communities are composed of complex and heterogeneous assemblages of small  
26 animals, small single-celled eukaryotes (protists), prokaryotes and viruses - that drift with  
27 currents. They contribute to the regulation of the Earth system notably through primary  
28 production via photosynthesis<sup>1</sup>, carbon export to the deep oceans<sup>2,3</sup> and form the base of  
29 the food webs that sustain the whole trophic chain in the oceans and beyond<sup>4</sup>.

30 The composition of communities is known to vary over time at a given site with daily<sup>5</sup> to  
31 seasonal fluctuations<sup>6</sup> following environmental variability<sup>7,8</sup>. Overlying these relatively

32 short scale spatio-temporal variations, a more macroscale partitioning of the ocean was  
33 evidenced by different combinations of biological and physico-chemical data<sup>9-11</sup>, and  
34 recently at the resolution of community genomics<sup>12</sup>. The basin scale biogeographical  
35 structure was proposed to result from a combination of multiple bio-physico-chemical  
36 processes named the seascape<sup>7,8</sup>, including both abiotic and biotic interactions<sup>13</sup>, neutral  
37 genetic drift<sup>14</sup>, natural selection<sup>15-17</sup>, temperature variations, nutrient supply but also  
38 advection and mixing along currents<sup>12,14</sup>.

39 Today, knowledge of global scale plankton biogeography at the DNA level is in its infancy.  
40 We lack understanding and theoretical explanations for the emergence and maintenance of  
41 biogeographical patterns at genomic resolution. Omics data (*i.e.* the DNA/RNA sequences  
42 representative of the variety of coding and non-coding sequences of organisms) provide  
43 the appropriate resolution to track and record global biogeographical features<sup>12</sup>,  
44 modulation of the repertoire of expressed genes in a community in response to  
45 environmental conditions<sup>2,18,19</sup> as well as eco-evolutionary processes<sup>14,16,17</sup>. Importantly,  
46 metagenomic sequencing can be consistently analyzed across plankton organisms as  
47 recently demonstrated by global expeditions<sup>20-23</sup>. Furthermore, the strong links between  
48 plankton and environmental conditions suggest potentially major consequences of climate  
49 change on community composition and biogeography<sup>24,25</sup>. Time series observations have  
50 highlighted recent changes in the planktonic ecosystem attributed to this anthropogenic  
51 pressure, such as changes in community composition<sup>26-28</sup> or poleward shifts of some  
52 species<sup>29,30</sup>. These changes are expected to intensify with ongoing climate warming and  
53 could lead to major reorganizations in plankton community composition<sup>24,25</sup>, with a  
54 potential decline in diversity<sup>31-33</sup>. Another major consequence of a global reorganization of  
55 the seascape on biological systems (e.g. growth, grazing) would be a decrease of primary  
56 production at mid-latitudes and an increase at higher latitudes<sup>34</sup>.

57 Here we report a global structure of plankton biogeography based on metagenomic data  
58 using niche models and its putative modifications under climate change. First, we show  
59 that environmental niches<sup>35</sup>, *i.e.* the envelope of environmental parameters suitable for an  
60 organism or a population, can be defined at the scale of genomic provinces across 6  
61 organism size fractions representing major plankton groups from nano- (viruses) to meso-  
62 zooplankton (small metazoans). Then, we spatially extrapolate their niches into climatic

63 provinces to depict the structure of plankton biogeography of all but arctic regions for each  
64 size fraction and for all combined. Then, considering the same niches, we assess putative  
65 spatial reorganization of the same provinces and their associated environmental drivers  
66 under climate change at the end of the century.

### 67 **Niche models and signature genomes from genomic provinces**

68 We use 38 previously defined genomic provinces<sup>12</sup> containing at least 4 sampling sites;  
69 they correspond to 595 metagenomes for 6 size fractions (ranging from 0 to 2000  $\mu\text{m}$ ) and  
70 sampled in 95 sites from all oceans except the Arctic (Supplementary Figs. 1-2).

71 To compute and test the validity of realized environmental niches, we train four machine  
72 learning techniques to probabilistically associate genomic provinces with environmental  
73 data: sea surface temperature, salinity, three macronutrients (dissolved silica, nitrate and  
74 phosphate), one micronutrient (dissolved iron) plus a seasonality index of nitrate. A valid  
75 environmental niche is obtained for 27 out of 38 initial provinces (71%) comforting their  
76 definition and covering 529 samples out of 595 (89%, Supplementary Fig. 2). Rejected  
77 provinces contain relatively few stations (mean of  $6 \pm 2.6$  versus  $19 \pm 15.3$  for valid  
78 provinces,  $p\text{-value} < 10^{-3}$  Wilcoxon test). For spatial and temporal extrapolations of the  
79 provinces presented below, we use the ensemble model approach<sup>36</sup> that considers mean  
80 predictions of machine learning techniques.

81 The signal of ocean partitioning is likely due to abundant and compact genomes whose  
82 geographical distributions closely match provinces. Within a collection of 523 prokaryotic  
83 and 713 eukaryotic genomes<sup>37,38</sup> from *Tara* Oceans samples, we find signature genomes for  
84 all but 4 provinces. In total, they correspond to respectively 96 and 52 of the genomes and  
85 their taxonomies are coherent with the size fractions (Fig. 1 for eukaryotes and  
86 Supplementary Fig. 3 for prokaryotes). Some of them correspond to unexplored lineages  
87 highlighting the gap of knowledge for organisms that structure plankton biogeography and  
88 the strength of a rationale devoid of any *a priori* on reference genomes or species.

### 89 **Structure of present day biogeography of plankton**

90 To extrapolate to a global ocean biogeography for each size fraction, we define the most  
91 probable provinces, named hereafter as *dominant* and assigned to a climatic annotation  
92 (Supplementary Table 1), on each  $1^\circ \times 1^\circ$  resolution grid point using 2006-13 WOA13  
93 climatology<sup>39</sup> (Supplementary Fig. 4 and Fig. 3).

94 Overall, in agreement with previous observations<sup>12</sup>, provinces of large size fractions (>20  
95  $\mu\text{m}$ ) are wider and partially decoupled from those of smaller size fractions, probably due to  
96 differential responses to oceanic circulation and environmental variations, different life  
97 cycle constraints, lifestyles<sup>7,8,12</sup> and trophic networks positions<sup>40</sup>. Biogeographies of small  
98 metazoans that enrich the largest size fractions (180-2000  $\mu\text{m}$  and 20-180  $\mu\text{m}$ ) are broadly  
99 aligned with latitudinal bands (tropico-equatorial, temperate and (sub)-polar) dominated  
100 by a single province (Fig. 2a,b). A more complex oceanic structuring emerges for the  
101 smaller size fractions (<20  $\mu\text{m}$ ) (Fig. 2c-f) with several provinces per large geographical  
102 region. Taking size fraction 0.8-5  $\mu\text{m}$  enriched in small protists (Fig. 2d) as an example,  
103 distinct provinces are identified for oligotrophic gyres in the Atlantic and Pacific Oceans,  
104 and one for the nutrient-rich equatorial upwelling region. A complex pattern of provinces,  
105 mostly latitudinal, is also found for the bacteria enriched size class (Fig. 2e, 0.22-3  $\mu\text{m}$ ) and  
106 the virus enriched size class (Fig. 2f, 0-0.2  $\mu\text{m}$ ) though less clearly linked to large-scale  
107 oceanographic regions. A single province extending from temperate to polar regions  
108 emerges from the size fraction 5-20  $\mu\text{m}$  enriched in protists (Fig. 2c), for which a smaller  
109 number of samples is available (Supplementary Fig. 2b-c), which probably biases this  
110 result. Finally, we use PHATE<sup>41</sup> dimension reduction algorithm to combine all provinces for  
111 all size classes into a single consensus biogeography revealing 4 or 7 robust clusters (Fig.  
112 2g,h). The 4 cluster consensus biogeography is mainly latitudinally organized  
113 distinguishing polar, subpolar, temperate and tropico-equatorial regions. The 7 cluster  
114 consensus biogeography distinguishes the equatorial pacific upwelling biome and three  
115 subpolar biomes that most likely reflect the chemico-physical structuring of the Southern  
116 Ocean and known polar fronts (red lines Fig. 2h). However, learning data are scarcer south  
117 of 60°S so these extrapolations need to be taken with caution.

118 Previous ocean partitioning either in biomes<sup>9-11</sup> or biogeochemical provinces (BGCPs)<sup>9,11</sup>  
119 are based on physico-biogeochemical characteristics including SST<sup>9-11</sup>, chlorophyll *a*<sup>9-11</sup>,  
120 salinity<sup>9-11</sup>, bathymetry<sup>9,11</sup>, mixed layer depth<sup>10</sup> or ice fraction<sup>10</sup>. Considering three of these  
121 partitions as examples we notice differences with our partitions (Supplementary Fig. 7-8)  
122 for example in terms of number of regions in the considered oceans (56 for 2013  
123 Reygondeau et al. BGCPs<sup>11</sup>, 17 for Fay and McKingley<sup>10</sup>) and structure (the coastal biome  
124 for 2013 Reygondeau et al. biomes<sup>11</sup>). Numerical comparison of our partitions with others

125 (*Methods*), reveals low similarity between them, the highest being with Reygondeau biomes  
126 (Supplementary Figs. 7-9). However, biomes and BGCP frontiers closely match our  
127 province frontiers in many cases. Near the frontiers, *dominant* provinces have smaller  
128 probabilities in agreement with smooth transitions instead of sharp boundaries as already  
129 proposed<sup>9</sup> and with a seasonal variability of the frontiers<sup>11</sup> (Supplementary Fig 7). Some of  
130 these transitions are very large and match entire BGCPs, for example in subtropical North  
131 Atlantic and subpolar areas where high annual variations are well known<sup>11</sup>.

### 132 **Future changes in plankton biogeography structure**

133 We assess the impacts of climate change on plankton biogeography at the end of the 21<sup>st</sup>  
134 century following the Representative Concentration Pathway 8.5 (RCP8.5)<sup>42</sup> greenhouse  
135 gas emission scenario. To consistently compare projections of present and future  
136 biogeographies with coherent spatial structures, we use a bias-adjusted mean of 6 Earth  
137 System Model (ESM) climatologies (Supplementary Table 2, Supplementary Fig. 10,  
138 *Materials and Methods*). The highest warming (7.2°C) is located off the east coast of Canada  
139 in the North Atlantic while complex patterns of salinity and nutrient variations are  
140 projected in all oceans (Supplementary Figure 11). According to this scenario, future  
141 temperature at most sampling sites will be higher than the mean and maximum  
142 contemporary temperature within their current province (Supplementary Fig. 12).

143 Our projections indicate multiple large-scale changes in biogeographical structure  
144 including plankton organism size-dependent province expansions or shrinkages and shifts  
145 (Supplementary Fig. 13-15). A change in the *dominant* province in at least one size fraction  
146 would occur over 60.1 % of the ocean surface, ranging from 12 % (20-180  $\mu\text{m}$ ) to 31%  
147 (0.8-5  $\mu\text{m}$ ) (Table 1).

148 Centroids of provinces with *dominance* areas larger than  $10^6 \text{ km}^2$  within a basin would be  
149 moved at least 200 km away for 77% of them, 96 % of which move poleward  
150 (Supplementary Figs. 14 and 14). Most longitudinal shift distances are smaller (50% <190  
151 km) but a few are larger than 1000 km while the distribution of latitudinal shifts is more  
152 concentrated around the mean (290 km) with no shifts superior to 1000 km  
153 (Supplementary Fig. 15b). These important longitudinal shifts corroborate existing  
154 projections<sup>24,43,44</sup> and differ from trivial poleward shifts due to temperature increase,  
155 reflecting more complex spatial rearrangements of the other environmental drivers

156 (Supplementary Fig. 11). We find an average displacement speed of the provinces'  
157 centroids of  $76 \pm 79 \text{ km.dec}^{-1}$  (latitudinally mean of  $34 \pm 82 \text{ km.dec}^{-1}$  and  $59 \pm 82 \text{ km.dec}^{-1}$   
158 longitudinally; median of  $47 \text{ km.dec}^{-1}$ ,  $23 \text{ km.dec}^{-1}$  latitudinally and  $27 \text{ km.dec}^{-1}$   
159 longitudinally). We project phytoplankton provinces displacements similar to previously  
160 published shifts for the North Pacific (poleward shift of  $118 \text{ km.dec}^{-1}$  for province C4  
161 versus  $100 \text{ km.dec}^{-1}$  for the subtropical biome of Polovina et al.<sup>44</sup> and eastward shift of  $195$   
162  $\text{km.dec}^{-1}$  for province C9 versus  $200 \text{ km.dec}^{-1}$  for the equatorial biome of Polovina et al.<sup>44</sup>).  
163 For all size fractions, climate change would lead to a poleward expansion of tropical and  
164 equatorial provinces at the expense of temperate provinces (Table 1 and Supplementary  
165 Fig. 13). This is illustrated for the size fraction 180-2000 by the example of the temperate  
166 province F5 (Supplementary Fig. 16) for which significant shrinkage is projected in the five  
167 major ocean basins. In the North Atlantic, its centroid would move approximately 800 km  
168 to the northeast (Supplementary Fig. 16c).

169 To simplify comparisons between future and present biogeographies, we combine all  
170 projections into two comparable consensus maps (Fig. 2e,f). Some particularly visible  
171 patterns of geographical reorganization are common to several or even all size fractions  
172 and visible on the consensus maps (Fig. 2e,f compared to Fig. 2a-d and Supplementary Fig.  
173 13). For example, the tropico-equatorial and tropical provinces expand in all size fractions  
174 and the provinces including the pacific equatorial upwelling shrink for size fractions  
175 smaller than  $20 \mu\text{m}$ .

176 To further quantify patterns of expansion or shrinkage, we calculate the surface covered by  
177 the *dominant* provinces weighted by probabilities of presence (Supplementary Fig. 17,  
178 Supplementary Table 1). In this way, *dominant* provinces are defined on 100% of the  
179 surface ocean ( $327$  millions of  $\text{km}^2$ ) but their presence probabilities correspond to the  
180 equivalent of 45 to 74% (due to sampling variability and niche overlaps) of the surface  
181 ocean depending on plankton size fraction (Table 1). Overall, our results indicate  
182 expansions of the surface of tropical and tropico-equatorial provinces but in very different  
183 ways depending on the size fractions of organisms. The surface area of temperate  
184 provinces is  $\sim 22$  million  $\text{km}^2$  on average (from  $10 \text{ Mkm}^2$  for  $0\text{-}0.2 \mu\text{m}$  to  $49 \text{ Mkm}^2$  for  $20\text{-}$   
185  $180 \mu\text{m}$ ) and should decrease by 36% on average (from -20 % for  $5\text{-}20 \mu\text{m}$  up to -54% for  
186  $0.8\text{-}5 \mu\text{m}$ , -12 million  $\text{km}^2$  on average, +6 % for  $0.22\text{-}3 \mu\text{m}$ ). Tropical provinces cover  $\sim 118$

187 million km<sup>2</sup> on average (from 86 Mkm<sup>2</sup> for 0.8-5 μm up to 169 Mkm<sup>2</sup> for 180-2000 μm) and  
188 their coverage should increase by 32% on average (from +13% for 0-0.2 μm up to +75%  
189 for 0.8-5 μm, +25 million km<sup>2</sup> on average) (Supplementary Fig. 17 and Supplementary  
190 Table 1).

191 We calculate at each grid point a single dissimilarity index (*Materials and Methods*)  
192 between probabilities of future and present *dominant* provinces for all size fractions  
193 combined (Fig. 4a). Areas located between future and present borders of expanding and  
194 shrinking provinces would be the most subject to replacements by other contemporary  
195 provinces, as exemplified by the poleward retraction of the southern/northern edges of the  
196 temperate provinces (red arrows on Fig. 4a, Table 1). High dissimilarities are obtained  
197 over northern (25° to 60°) and symmetrically southern (-25 to -60°) temperate regions  
198 (mean of 0.29 and 0.24 respectively). Despite important environmental changes in austral  
199 and equatorial regions (Supplementary Fig. 11) and projected change in diversity<sup>31-33</sup> and  
200 biomass<sup>45</sup>, the contemporary provinces remain the most probable at the end of the century  
201 using our statistical models (mean dissimilarities of 0.18 and 0.02 respectively) as no  
202 known contemporary provinces could replace them.

203 To further study the decoupling between provinces of different size fractions in the future  
204 we considered the assemblages of *dominant* provinces of each size fraction. By using two  
205 differently stringent criteria, from 45.3 to 57.1% of ocean surface, mainly located in  
206 temperate regions, would be inhabited in 2090-99 by assemblages that exist elsewhere in  
207 2006-15 (Fig. 4b versus Fig. 4c). Contemporary assemblages would disappear on 3.5 to  
208 3.8% of the surface, and, conversely, novel assemblages, not encountered today, would  
209 cover 2.9 to 3.0% of the surface. These areas appear relatively small but they include some  
210 important economic zones (Fig 4b, Supplementary Fig. 18). On 41.8% to 51.8% of the  
211 surface of the main fisheries and 41.2% to 54.2% of Exclusive Economic Zones (*Materials*  
212 *and Methods*), future assemblages would differ from those present today (Supplementary  
213 Fig. 18).

#### 214 **Drivers of plankton biogeography reorganization**

215 We quantify the relative importance of considered environmental parameters  
216 (temperature, salinity, dissolved silica, macronutrients and seasonality of nitrate) into  
217 niche definition and in driving future changes of the structure of plankton biogeography.

218 Among environmental properties that define the niches, temperature is the first influential  
219 parameter (for 19 niches out of 27) but only at 22.6% on average. Particularly, the  
220 distribution of relative influences of temperature is spread over a much wider range than  
221 that of other parameters (Supplementary Fig. 18a).

222 The relative impact of each environmental parameter is calculated<sup>24</sup> for each site  
223 presenting a significant dissimilarity between 2006-15 and 2090-99 (Fig 5a). Overall, SST  
224 would be responsible for reorganization of half of the provinces followed by Phosphate (11  
225 %) and Salinity (10.3%) (Supplementary Fig. 20). SST is the primary driver over the  
226 majority of the ocean (Fig. 5a). In some regions, salinity (e.g. eastern North Atlantic) and  
227 Phosphate (e.g. equatorial region) dominate (Fig. 5a) and excluding the effect of SST, they  
228 are the primary drivers of global reorganization of the provinces (Fig. 5 b). The impact of  
229 SST varies across size classes with a significantly higher contribution in large size classes  
230 (>20  $\mu\text{m}$ ) compared to the small ones (mean of  $\sim 73\%$  versus  $\sim 49\%$ ; Fig. 5c). Even though  
231 the contribution of combined nutrients to niche definition is similar for small and large size  
232 classes under present day conditions (mean of  $\sim 56\%$  versus  $\sim 61\%$ , Supplementary Fig. 19,  
233 Supplementary Table 3), their future projected variations have a higher relative impact on  
234 the reorganization of small organisms' biogeographies (mean of  $\sim 39\%$  versus  $\sim 20\%$ , t-test  
235 p-value < 0.05, Supplementary Fig. 19, Supplementary Table 3). For instance, in the tropical  
236 zone, the shrinkage of the equatorial province (province C9, size fraction 0.8 – 5  $\mu\text{m}$ , Fig.  
237 2b,d, Supplementary Fig. 16e) is driven at 24 % by reduction of dissolved phosphate  
238 concentrations and at 25% by SST increase. In contrast, SST and Salinity would drive  
239 respectively at 56% and 16% the shrinkage of the temperate province F5 of size fraction  
240 180-2000  $\mu\text{m}$  (Supplementary Fig. 16d versus e). Non-poleward shifts are found only  
241 within small size fractions (<20  $\mu\text{m}$ ) (Supplementary Fig. 14, 15) highlighting differential  
242 responses to nutrients and SST changes between large and small size classes, the latter  
243 being enriched in phytoplankton that directly rely on nutrient supplies.

## 244 **Discussion**

245 We propose a novel partitioning of the ocean based on metagenomic sampling,  
246 complementing pioneer and recent efforts based on other bio-physico-chemical data<sup>9-11</sup>.  
247 Though they are initially built at genomic scale, our biogeographies paradoxically reveal  
248 basin scale provinces that are larger than BGCPs<sup>11</sup> and biomes<sup>10</sup>, and probably relatively



249 stable across seasons evoking limited effects of seasonality on frontiers positions of BGCPs  
250 provinces<sup>11</sup>. We propose that this apparent paradox emerges from the combination of the  
251 scale, nature and resolution of sampling. First, two proximal samples from the *Tara* Oceans  
252 expedition are separated by ~300 km on average sampled over three years; this relatively  
253 large spatio-temporal scale overlies shorter scale compositional variations previously  
254 observed<sup>5,6</sup>. Second, our estimates of plankton community dissimilarities are highly  
255 resolute; they are computed at genomic scale with billions of small DNA fragments<sup>12,20</sup>  
256 thus smoothing the more discrete species level signal. Together, from these combinations  
257 of processes and patterns occurring at multiple scales emerge basin scale provinces  
258 associated with coherent environmental niches and signature genomes.

259 Our provinces are structured in broad latitudinal bands with smaller organisms (<20  $\mu$ m)  
260 displaying more complex patterns and partially decoupled from larger organisms. This  
261 decoupling is the result of distinct statistical links between provinces based on organism  
262 size fractions and environmental parameters and could reflect their respective trophic  
263 modes<sup>40</sup>.

264 Complex changes of the parameters defining the niches are projected under climate change  
265 leading to size-dependent modifications of biogeographical patterns, as for example  
266 smaller organisms being more sensitive to nutrient changes. Assuming the maintenance of  
267 environmental characteristics that define provinces, climate change is projected to  
268 restructure plankton provinces over approximately 50% of surface oceans south of 60°N  
269 by the end of the century (Fig. 4). The largest reorganization is detected in subtropical and  
270 temperate regions in agreement with other studies<sup>32,44</sup> and is accompanied by appearance  
271 and disappearance of size-fractionated provinces' assemblages. For tropico-equatorial and  
272 austral regions, out of contemporary range and novel environmental conditions are  
273 projected. While some studies extrapolate important diversity and biomass changes in  
274 these zones<sup>31-33,45</sup>, here we project shifts of their boundaries and maintain their climatic  
275 label. However, the present approach does not account for putative changes in community  
276 composition nor the emergence of novel niches over these regions for which novel  
277 environmental selection pressure is expected.

278 Overall, our projections for the end of the century do not take into account possible future  
279 changes of major bio-physico-chemical factors such as dynamics of community mixing,

280 trophic interactions through transport<sup>46</sup>, the potential dynamics of the genomes<sup>14,16,17</sup>  
281 (adaptation or acclimation) and biomass variations<sup>45</sup>. New sampling in current and future  
282 expeditions<sup>47</sup>, as well as ongoing technological improvements in bio-physico-chemical  
283 characterization of seawater samples<sup>38,47,48</sup> will soon refine functional<sup>18,49</sup>, environmental  
284 (micronutrients<sup>50</sup>) and phylogenetic<sup>16,17</sup> characterization of plankton ecosystems for  
285 various biological entities (genotypes, species or communities) and spatio-temporal  
286 scales<sup>47</sup>. Ultimately, crossing this varied information will allow a better understanding of  
287 the conditions of emergence of ecological niches in the seascape and their response to a  
288 changing ocean.

## 289 **References**

- 290 1. Field, C. B., Behrenfeld, M. J., Randerson, J. T. & Falkowski, P. Primary production of the  
291 biosphere: Integrating terrestrial and oceanic components. *Science* (80-. ). (1998).  
292 doi:10.1126/science.281.5374.237
- 293 2. Guidi, L. *et al.* Plankton networks driving carbon export in the oligotrophic ocean. *Nature*  
294 (2016). doi:10.1038/nature16942
- 295 3. Henson, S. A., Sanders, R. & Madsen, E. Global patterns in efficiency of particulate organic  
296 carbon export and transfer to the deep ocean. *Global Biogeochem. Cycles* (2012).  
297 doi:10.1029/2011GB004099
- 298 4. Azam, F. *et al.* The Ecological Role of Water-Column Microbes in the Sea. *Mar. Ecol. Prog. Ser.*  
299 (1983). doi:10.3354/meps010257
- 300 5. Saab, M. A. abi. Day-to-day variation in phytoplankton assemblages during spring blooming  
301 in a fixed station along the Lebanese coastline. *J. Plankton Res.* (1992).  
302 doi:10.1093/plankt/14.8.1099
- 303 6. Djurhuus, A. *et al.* Environmental DNA reveals seasonal shifts and potential interactions in a  
304 marine community. *Nat. Commun.* (2020). doi:10.1038/s41467-019-14105-1
- 305 7. Kavanaugh, M. T. *et al.* Seascapes as a new vernacular for pelagic ocean monitoring,  
306 management and conservation. *ICES J. Mar. Sci.* (2016). doi:10.1093/icesjms/fsw086
- 307 8. Steele, J. H. The ocean 'landscape'. *Landsc. Ecol.* (1989). doi:10.1007/BF00131537
- 308 9. Longhurst, A. R. *Ecological Geography of the Sea. Ecological Geography of the Sea* (2007).  
309 doi:10.1016/B978-0-12-455521-1.X5000-1
- 310 10. Fay, A. R. & McKinley, G. A. Global open-ocean biomes: Mean and temporal variability. *Earth*  
311 *Syst. Sci. Data* (2014). doi:10.5194/essd-6-273-2014

- 312 11. Reygondeau, G. *et al.* Dynamic biogeochemical provinces in the global ocean. *Global*  
313 *Biogeochem. Cycles* (2013). doi:10.1002/gbc.20089
- 314 12. Richter, D. J. *et al.* Genomic evidence for global ocean plankton biogeography shaped by  
315 large-scale current systems. *bioRxiv* 867739 (2019). doi:10.1101/867739
- 316 13. Dutkiewicz, S. *et al.* Dimensions of marine phytoplankton diversity. *Biogeosciences* (2020).  
317 doi:10.5194/bg-17-609-2020
- 318 14. Hellweger, F. L., Van Sebille, E. & Fredrick, N. D. Biogeographic patterns in ocean microbes  
319 emerge in a neutral agent-based model. *Science* (80-. ). (2014). doi:10.1126/science.1254421
- 320 15. Sauterey, B., Ward, B., Rault, J., Bowler, C. & Claessen, D. The Implications of Eco-Evolutionary  
321 Processes for the Emergence of Marine Plankton Community Biogeography. *Am. Nat.* (2017).  
322 doi:10.1086/692067
- 323 16. Laso-Jadart, R. *et al.* Investigating population-scale allelic differential expression in wild  
324 populations of *Oithona similis* (Cyclopoida, Claus, 1866). *Ecol. Evol.* (2020).  
325 doi:10.1002/ece3.6588
- 326 17. Delmont, T. O. *et al.* Single-amino acid variants reveal evolutionary processes that shape the  
327 biogeography of a global SAR11 subclade. *Elife* (2019). doi:10.7554/eLife.46497
- 328 18. Carradec, Q. *et al.* A global ocean atlas of eukaryotic genes. *Nat. Commun.* (2018).  
329 doi:10.1038/s41467-017-02342-1
- 330 19. Salazar, G. *et al.* Gene Expression Changes and Community Turnover Differentially Shape the  
331 Global Ocean Metatranscriptome. *Cell* (2019). doi:10.1016/j.cell.2019.10.014
- 332 20. Alberti, A. *et al.* Viral to metazoan marine plankton nucleotide sequences from the Tara  
333 Oceans expedition. *Sci. Data* (2017). doi:10.1038/sdata.2017.93
- 334 21. Pesant, S. *et al.* Open science resources for the discovery and analysis of Tara Oceans data.  
335 *Sci. Data* (2015). doi:10.1038/sdata.2015.23
- 336 22. Karsenti, E. *et al.* A holistic approach to marine Eco-systems biology. *PLoS Biol.* (2011).  
337 doi:10.1371/journal.pbio.1001177
- 338 23. Duarte, C. M. Seafaring in the 21st century: The Malaspina 2010 circumnavigation  
339 expedition. *Limnology and Oceanography Bulletin* (2015). doi:10.1002/lob.10008
- 340 24. Barton, A. D., Irwin, A. J., Finkel, Z. V. & Stock, C. A. Anthropogenic climate change drives shift  
341 and shuffle in North Atlantic phytoplankton communities. *Proc. Natl. Acad. Sci.* (2016).  
342 doi:10.1073/pnas.1519080113
- 343 25. Benedetti, F., Guilhaumon, F., Adloff, F. & Ayata, S. D. Investigating uncertainties in  
344 zooplankton composition shifts under climate change scenarios in the Mediterranean Sea.

- 345 *Ecography (Cop.)*. (2018). doi:10.1111/ecog.02434
- 346 26. Beaugrand, G. *et al.* Prediction of unprecedented biological shifts in the global ocean. *Nature*  
347 *Climate Change* (2019). doi:10.1038/s41558-019-0420-1
- 348 27. McMahan, K. W., McCarthy, M. D., Sherwood, O. A., Larsen, T. & Guilderson, T. P. Millennial-  
349 scale plankton regime shifts in the subtropical North Pacific Ocean. *Science (80-. )*. (2015).  
350 doi:10.1126/science.aaa9942
- 351 28. Rivero-Calle, S., Gnanadesikan, A., Del Castillo, C. E., Balch, W. M. & Guikema, S. D.  
352 Multidecadal increase in North Atlantic coccolithophores and the potential role of rising CO<sub>2</sub>.  
353 *Science (80-. )*. (2015). doi:10.1126/science.aaa8026
- 354 29. Beaugrand, G. Decadal changes in climate and ecosystems in the North Atlantic Ocean and  
355 adjacent seas. *Deep. Res. Part II Top. Stud. Oceanogr.* (2009). doi:10.1016/j.dsr2.2008.12.022
- 356 30. Pinsky, M. L., Worm, B., Fogarty, M. J., Sarmiento, J. L. & Levin, S. A. Marine taxa track local  
357 climate velocities. *Science (80-. )*. (2013). doi:10.1126/science.1239352
- 358 31. Thomas, M. K., Kremer, C. T., Klausmeier, C. A. & Litchman, E. A global pattern of thermal  
359 adaptation in marine phytoplankton. *Science (80-. )*. (2012). doi:10.1126/science.1224836
- 360 32. Busseni, G. *et al.* Large scale patterns of marine diatom richness: Drivers and trends in a  
361 changing ocean. *Glob. Ecol. Biogeogr.* (2020). doi:10.1111/geb.13161
- 362 33. Ibarbalz, F. M. *et al.* Global Trends in Marine Plankton Diversity across Kingdoms of Life. *Cell*  
363 (2019). doi:10.1016/j.cell.2019.10.008
- 364 34. Bopp, L. *et al.* Multiple stressors of ocean ecosystems in the 21st century: Projections with  
365 CMIP5 models. *Biogeosciences* (2013). doi:10.5194/bg-10-6225-2013
- 366 35. Hutchinson, G. E. Concluding remarks. *Cold Spring Harb. Symp. Quant. Biol.* (1957).
- 367 36. Jones, M. C. & Cheung, W. W. L. Multi-model ensemble projections of climate change effects  
368 on global marine biodiversity. *ICES J. Mar. Sci.* (2015). doi:10.1093/icesjms/fsu172
- 369 37. Delmont, T. O. *et al.* Nitrogen-fixing populations of Planctomycetes and Proteobacteria are  
370 abundant in surface ocean metagenomes. *Nat. Microbiol.* (2018). doi:10.1038/s41564-018-  
371 0176-9
- 372 38. Delmont, T. O. *et al.* Functional repertoire convergence of distantly related eukaryotic  
373 plankton lineages revealed by genome-resolved metagenomics. *bioRxiv* 2020.10.15.341214  
374 (2020). doi:10.1101/2020.10.15.341214
- 375 39. Boyer, T. P. *et al.* WORLD OCEAN DATABASE 2013, NOAA Atlas NESDIS 72. *Sydney Levitus,*  
376 *Ed.; Alexey Mishonoc, Tech. Ed.* (2013). doi:10.7289/V5NZ85MT
- 377 40. Sunagawa, S. *et al.* Tara Oceans: towards global ocean ecosystems biology. *Nature Reviews*

- 378 *Microbiology* (2020). doi:10.1038/s41579-020-0364-5
- 379 41. Moon, K. R. *et al.* Visualizing structure and transitions in high-dimensional biological data.  
380 *Nat. Biotechnol.* (2019). doi:10.1038/s41587-019-0336-3
- 381 42. van Vuuren, D. P. *et al.* The representative concentration pathways: An overview. *Clim.*  
382 *Change* (2011). doi:10.1007/s10584-011-0148-z
- 383 43. Marinov, I. *et al.* North-South asymmetry in the modeled phytoplankton community  
384 response to climate change over the 21st century. *Global Biogeochem. Cycles* (2013).  
385 doi:10.1002/2013GB004599
- 386 44. Polovina, J. J., Dunne, J. P., Woodworth, P. A. & Howell, E. A. Projected expansion of the  
387 subtropical biome and contraction of the temperate and equatorial upwelling biomes in the  
388 North Pacific under global warming. *ICES J. Mar. Sci.* (2011). doi:10.1093/icesjms/fsq198
- 389 45. Flombaum, P., Wang, W. L., Primeau, F. W. & Martiny, A. C. Global picophytoplankton niche  
390 partitioning predicts overall positive response to ocean warming. *Nat. Geosci.* (2020).  
391 doi:10.1038/s41561-019-0524-2
- 392 46. Iudicone, D. Some may like it hot. *Nature Geoscience* (2020). doi:10.1038/s41561-020-0535-  
393 z
- 394 47. Gorsky, G. *et al.* Expanding Tara Oceans Protocols for Underway, Ecosystemic Sampling of  
395 the Ocean-Atmosphere Interface During Tara Pacific Expedition (2016–2018). *Front. Mar.*  
396 *Sci.* (2019). doi:10.3389/fmars.2019.00750
- 397 48. Istace, B. *et al.* de novo assembly and population genomic survey of natural yeast isolates  
398 with the Oxford Nanopore MinION sequencer. *Gigascience* (2017).  
399 doi:10.1093/gigascience/giw018
- 400 49. Bussen, G. *et al.* Meta-Omics Reveals Genetic Flexibility of Diatom Nitrogen Transporters in  
401 Response to Environmental Changes. *Mol. Biol. Evol.* (2019). doi:10.1093/molbev/msz157
- 402 50. Grand, M. M. *et al.* Developing autonomous observing systems for micronutrient trace  
403 metals. *Frontiers in Marine Science* (2019). doi:10.3389/fmars.2019.00035

## 404 **Acknowledgments**

405 PF was supported by a CFR doctoral fellowship and the *NEOGEN impulsion* grant from the  
406 Direction de la recherche fondamentale (DRF) of the CEA. We thank the LSCE (Laboratoire  
407 des sciences du climat et de l'environnement, CEA) for providing Earth System Models  
408 outputs, Tilla Roy for preparation of the data, LAGE (Laboratoire d'Analyses Génomiques  
409 des Eucaryotes, CEA) members for stimulating discussions on this project, Mahendra  
410 Mariadassou, Sakina Dorothee Ayata and Bruno Hay Mele for discussions on statistics and

411 climate envelop models, Laurent Bopp for initial discussions on this project and on climate  
412 models, Tom Delmont for providing Metagenome-Assembled Genomes data and Noan Le  
413 Bescot (TernogDesign) for artwork on Figures. We thank all members of the *Tara Oceans*  
414 consortium for maintaining a creative environment and for their constructive criticism.  
415 *Tara Oceans* would not exist without the *Tara Ocean Foundation* and the continuous  
416 support of 23 institutes (<https://oceans.taraexpeditions.org/>).

417 This article is contribution number XX of *Tara Oceans*.

## 418 **Competing interests**

419 The authors declare no competing interests.

## 420 **Author contributions**

421 PF, OJ and MG conceived the study. MV wrote the bias correction algorithm. PF computed  
422 the results, compiled and analyzed the data. PF wrote the initial draft of the paper. JL, OJ  
423 and MG conducted a preliminary study. PF, OJ, MG, MV, DI, and PW discussed the results  
424 and contributed to write the paper.

## 425 **Online content**

426 Supplementary information, additional references, source data and codes are available at  
427 [www.doi.xx.com/](http://www.doi.xx.com/)

## 428 **Materials and methods**

### 429 **Genomic provinces of plankton**

430 Environmental niches are computed for trans-kingdom plankton genomic provinces from  
431 Richter et al.<sup>12</sup>. They consist of the clustering of metagenomic dissimilarity matrices from 6  
432 available size fractions with sufficient metagenomic data from the *Tara Oceans* dataset. The  
433 six size fractions (0-0.2, 0.22-3, 0.8-5, 5-20, 20-180 and 180-2000  $\mu\text{m}$ ) represent major  
434 plankton groups. Two large size classes (180-2000  $\mu\text{m}$  and 20-180  $\mu\text{m}$ ) are enriched in  
435 zooplankton dominated by arthropods (mainly copepods) and cnidarians. They are  
436 expected to directly depend on smaller eukaryotes as they feed on them. Size classes 5-20  
437  $\mu\text{m}$  and 0.8-5  $\mu\text{m}$  are enriched in smaller eukaryotic algae, such as dynophytes (5-20  $\mu\text{m}$ ),  
438 pelagophytes and haptophytes (0.8-5  $\mu\text{m}$ ). The distribution of these photoautotrophs  
439 presumably depends on nutrient availability. Finally, size classes 0.22-3  $\mu\text{m}$  and 0-0.2  $\mu\text{m}$

440 are respectively enriched in bacteria and viruses. Bacteria are characterized by a wide  
441 range of trophisms including autotrophy (cyanobacteria), mixotrophy and heterotrophy,  
442 while viruses are mainly parasites. Within each size fraction (from large to small), there are  
443 respectively 8, 8, 11, 6, 6 and 8 (48 in total) provinces defined in Richter et al.<sup>12</sup> formed by  
444 *Tara* Oceans metagenomes (644 metagenomes sampled either at the surface (SUR) or at  
445 the Deep Chlorophyll Maximum (DCM) across 102 sites). The clustering of individual size  
446 fractions is independent.

#### 447 **Genome signature of the provinces**

448 We analyzed the distribution of 713 eukaryotic and 523 prokaryotic genomes<sup>37,38</sup> within  
449 the genomic provinces. These genomes are Metagenome-Assembled Genomes (MAGs)  
450 obtained from *Tara* Oceans metagenomes. For each size class, we select MAGs that are  
451 present (according to a criteria defined in Delmont et al.<sup>38</sup>) in at least 5 samples. We  
452 computed an index of presence enrichment of MAGs within provinces as the Jaccard  
453 index<sup>51</sup>, defined as follows:

$$J = \frac{M_{11}}{M_{11} + M_{01} + M_{10}}$$

454  
455  $M_{11}$  is the number of samples where the MAG is present and match a sample of the  
456 province.  $M_{01}$  and  $M_{10}$  are respectively the number of samples where the MAG is not  
457 present in a sample of the province and inversely. A MAG is considered to be signature of a  
458 province if the Jaccard index is superior to 0.5 with this province and inferior to 0.1 for all  
459 other provinces of the given size class (Fig. 1 and Supplementary Fig. 3).

#### 460 **World Ocean Atlas data**

461 Physicochemical parameters proposed to have an impact on plankton genomic provinces<sup>12</sup>  
462 are used to define environmental niches: sea surface temperature (SST), salinity (Sal);  
463 dissolved silica (Si), nitrate (NO<sub>3</sub>), phosphate (PO<sub>4</sub>), iron (Fe), and a seasonality index of  
464 nitrate (SI NO<sub>3</sub>). With the exception of Fe and SI NO<sub>3</sub>, these parameters are extracted from  
465 the gridded World Ocean Atlas 2013 (WOA13)<sup>39</sup>. Climatological Fe fields are provided by  
466 the biogeochemical model PISCES-v2<sup>52</sup>. The seasonality index of nitrate is defined as the  
467 range of nitrate concentration in one grid cell divided by the maximum range encountered  
468 in WOA13 at the *Tara* Oceans sampling stations. All parameters are co-located with the

469 corresponding stations and extracted at the month corresponding to the *Tara Oceans*  
470 sampling. To compensate for missing physicochemical samples in the *Tara Oceans in situ*  
471 data set, climatological data (WOA) are preferred. The correlation between in situ samples  
472 and corresponding values extracted from WOA are high ( $r^2$ : SST: 0.96, Sal: 0.83, Si: 0.97,  
473  $\text{NO}_3$ : 0.83,  $\text{PO}_4$ : 0.89). In the absence of corresponding WOA data, a search is done within  $2^\circ$   
474 around the sampling location and values found within this square are averaged.  
475 Nutrients, such as  $\text{NO}_3$  and  $\text{PO}_4$ , display a strong collinearity when averaged over the global  
476 ocean (correlation of 0.95 in WOA13) which could complicate disentangling their  
477 respective contributions to niche definition. However, observations and experimental data  
478 allow identification of limiting nutrients at regional scale characterized by specific plankton  
479 communities<sup>53</sup>. The projection of niches into future climate would yield spurious results  
480 when the present-day collinearity is not maintained<sup>54</sup> but there is up to now no evidence  
481 for large scale changes in global nutrient stoichiometry<sup>55</sup>.

#### 482 **Earth System Models and bias correction**

483 Outputs from 6 Earth System Models (ESM) (Supplementary Table 2) are used to project  
484 environmental niches under greenhouse gas emission scenario RCP8.5<sup>42</sup>. Environmental  
485 drivers are extracted for present day (2006-2015) and end of century (2090-2099)  
486 conditions for each model and the multi-model mean is computed. A bias correction  
487 method, the Cumulative Distribution Function transform, CDFt<sup>56</sup>, is applied to adjust the  
488 distributions of SST, Sal, Si,  $\text{NO}_3$  and  $\text{PO}_4$  of the multi-model mean to the WOA database.  
489 CDFt is based on a quantile mapping (QM) approach to reduce the bias between modeled  
490 and observed data, while accounting for climate change. Therefore, CDFt does not rely on  
491 the stationarity hypothesis and present and future distributions can be different. CDFt is  
492 applied on the global fields of the mean model simulations. By construction, CDFt preserves  
493 the ranks of the simulations to be corrected. Thus, the spatial structures of the model fields  
494 are preserved.

#### 495 **Environmental niche models: training, validation and projections**

496 Provinces with similar metagenomic content are retrieved from Richter et al.<sup>12</sup>. From a  
497 total of 48 initial provinces, 10 provinces are removed either because they are represented  
498 by too few samples (7 out of 10) or they are found in environments not resolved by ESMs



499 (e.g. lagoons of Pacific Ocean islands, 3 out of 10). Four machine learning methods are  
500 applied to compute environmental niches for each of the 38 provinces: Gradient Boosting  
501 Machine (gbm)<sup>57</sup>, Random Forest (rf)<sup>58</sup>, fully connected Neural Networks (nn)<sup>59</sup> and  
502 Generalized Additive Models (gam)<sup>60</sup>. Hyper parameters of each technique (except gam)  
503 are optimized. These are (1) for gbm, the interaction depth (1, 3 and 5), learning rate (0.01,  
504 0.001) and the minimum number of observations in a tree node (1 to 10); (2) for rf, the  
505 number of trees (100 to 900 with step 200 and 1000 to 9000 with step 2000) and the  
506 number of parameters used for each tree (1 to 7); (3) for nn, the number of layers of the  
507 network (1 to 10) and the decay ( $1 \cdot 10^{-4}$  to  $9 \cdot 10^{-4}$  and  $1 \cdot 10^{-5}$  to  $9 \cdot 10^{-5}$ ). For gam the number  
508 of splines is set to 3, respectively 2 only when not enough points are available (for fraction  
509 0-0.2, 65 points). R packages gbm (2.1.3), randomForest (4.6.14), mgcv (1.8.16) and nnet  
510 (7.3.12) are used for gbm, rf, nn and gam models.

511 To define the best combination of hyper parameters for each model, we perform 30  
512 random cross-validations by training the model on 75% (85 % for gbm and gam) of the  
513 dataset randomly sampled and by calculating the Area Under the Curve<sup>61</sup> (AUC) on the  
514 25% (15 % for gbm and gam) remaining points of the dataset. The best combination of  
515 hyper parameters is the one for which the mean AUC over the 30 cross-validation is the  
516 highest. A model is considered valid if at least 3 out of the 4 techniques have a mean AUC  
517 superior to 0.65, which is the case for 27 out of the 38 provinces (Supplementary Fig. 2a). A  
518 climatic annotation is given to the 27 validated niches (Supplementary Table 1). Final  
519 models are trained on the full dataset and only the techniques that have a mean AUC higher  
520 than 0.65 are considered to make the projections. The majority (23) of the 27 validated  
521 niches is validated by all four models and 4 by only 3 models. Relative influences of each  
522 parameter in defining environmental niches are calculated using the feature\_importance  
523 function from the DALEX R package<sup>62</sup> for all four statistical methods (Supplementary Fig.  
524 19a). To evaluate the consistency and coherence of environmental niche models, we first  
525 make global projections on the 2006-13 WOA2013 climatology. Projections are consistent  
526 with sampling regions for provinces encompassing vast oceanic areas. For example, the  
527 genomic province sampled in temperate Atlantic regions of size fraction 180-2000  $\mu\text{m}$  is  
528 projected to be present in the north and south temperate Atlantic but also other temperate  
529 regions (Supplementary Fig. 4). For model training and projections, physicochemical

530 variables are scaled to have a mean of 0 and a variance of 1. For this scaling, the mean and  
531 standard deviation of each WOA13 variable (+ PISCES-v2 Fe) co-localized with *Tara* Oceans  
532 stations with a value available are used. This standardization procedure allows for better  
533 performance of nn models. Finally, as statistical models often disagree on projection sets  
534 whereas they give similar predictions on the training set (Supplementary Fig. 5, 6), we use  
535 the ensemble model approach for global-scale projections of provinces<sup>36</sup> *i.e.* the mean  
536 projections of the validated machine learning techniques.

### 537 **Combined size classes provinces and ocean partitioning comparisons**

538 To combine all size classes' provinces, we use the PHATE algorithm<sup>41,63</sup> from R package  
539 phateR. This algorithm allows visualization of high dimensional data in the requested  
540 number of dimensions while best preserving the global data structure<sup>63</sup>. We choose to train  
541 PHATE separately on WOA13 projections and present day and end of century projections  
542 including presence probabilities of *non dominant* provinces. We use 3 dimensions and set  
543 hyper parameter k-nearest neighbors (knn) and decay respectively to 1000 for WOA13 and  
544 2000 for model data as in this case there are twice as many points. The hyper parameter  
545 knn reflects the degree to which the mapping of PHATE from high to low dimensionality  
546 should respect the global features of the data. We argue that 1000 and 2000 are good  
547 choices as it will be sufficient to have a highly connected graph, conserve global structure,  
548 allow visualization of structures of the size of the provinces (mean number of points in a  
549 province: 4867) and have a reasonable computational time. Decay is set to 20 in both cases.  
550 Then we cluster the resulting distance matrix using the k-medoids algorithm<sup>64</sup> and the  
551 silhouette average width criteria<sup>65</sup> is used as an indicator of good fit. The silhouette  
552 criterion is maximal for 2, 3 and 4 clusters and 2 peaks are found at 7 and 14 clusters (the  
553 peak at 7 is slightly less high than the one at 14, data not shown). We choose to present the  
554 4 and 7 clusters geographical patterns as they seem more relevant with respect to the  
555 resolutions of our environmental datasets (WOA13 and climate models). We compare the  
556 three polar clusters of the 7 cluster geographical patterns with Antarctic Circumpolar  
557 Currents fronts<sup>66</sup> by overlying them on the map (red lines Fig. 2h).

558 To visualize the global biogeography structure, the resulting 3 vectors of PHATE are  
559 plotted using an RGB color code. Each coordinate of each vector is respectively assigned to

560 a given degree of color component between 0 and 255 (8 bits red, green or blue) using the  
561 following formula (Fig. 1 g,h; Fig 2 e,f; Supplementary Fig. 7):

$$C_{col}(i) = \frac{C(i) - \min(C(1), C(2), C(3))}{\max(C(1), C(2), C(3)) - \min(C(1), C(2), C(3))} * 255$$

562  
563  $C(i)$  is the  $i$ th component of the PHATE axes. Respectively, components 1, 2 and 3 are  
564 assigned to red, green and blue.

565 To compare the six size fraction provinces, the combined size class with existing  
566 biogeochemical partitions of the oceans<sup>10,11</sup> and with each other, we use the adjusted rand  
567 index<sup>67</sup> (Supplementary Fig. 7-9) and overlay their masks above our partitions. In this case,  
568 presence probabilities of *dominant* provinces are not used anymore. Instead, each ocean  
569 grid point is assigned to the *dominant* provinces or the phate clusters.

### 570 **Bray-Curtis dissimilarity index**

571 Climate change impact on global projections is calculated at each grid point as the Bray-  
572 Curtis dissimilarity index<sup>68,69</sup> defined as follows:

$$BC = \frac{\sum_n |P_n^{future} - P_n^{present}|}{\sum_n |P_n^{future} + P_n^{present}|}$$

573  
574 Where ( $P_n^{present}$  and  $P_n^{future}$ ) are respectively the probability of presence of the province  $n$   
575 in present day and at the end of the century. Only the probabilities of *dominant* provinces  
576 are non-null and all others are set to zero. The mask of main fisheries<sup>70</sup> (chosen as the first  
577 4 deciles) and Exclusive Economical Zones<sup>71</sup> is overlaid on the Bray-Curtis map.

### 578 **Change in province assemblages**

579 A province assemblage is defined as the assemblage of *dominant* provinces of each size  
580 fraction at a given grid point of the considered ocean. We consider two criteria of change in  
581 province assemblage between present day and end of the century conditions. The first one,  
582 more straightforward and less stringent, considers that a province assemblage occurs  
583 when a change of *dominant* province is found in at least one size fraction. In a more  
584 stringent way, a change of assemblage is considered significant for  $BC > \frac{1}{6}$  (previous  
585 section). This threshold corresponds to an idealized case where each *dominant* province  
586 has a probability of one and a change of *dominant* province is found in only one size  
587 fraction. For example, the *dominant* province assemblage goes from vector

588 (F5,E6,D3,C8,B7,A7) (with the size fractions in decreasing order) corresponding to all  
589 temperate provinces to vector (F8,E6,D3,C8,B7,A7). This example corresponds to the  
590 replacement of the temperate province of size fraction 180-2000  $\mu\text{m}$  (F5) by the tropico-  
591 equatorial province (F8). This criterion allows us to discard assemblage changes for which  
592 the changes in probability of presence of *dominant* provinces are very low. With this  
593 criterion, only on a small oceanic area is found to have no changes of assemblage (Fig. 4c  
594 light blue zones).

### 595 **Centroids and migration shifts**

596 The centroid of each province is defined as the average latitude and longitude for which the  
597 probability of presence is superior to 0.5 and weighted by both the probability of presence  
598 at each grid point and the grid cell area. It is calculated for both present day conditions and  
599 end of the century conditions. The migration shift is calculated as the distance between the  
600 present day and the end of the century centroids considering the earth as a perfect sphere  
601 of radius 6371 km. For consistency (*i.e.* avoid long distance aberrant shifts), it is only  
602 calculated for provinces with an area of dominance larger than  $10^6 \text{ km}^2$  in the given basin.

### 603 **Driver analysis**

604 To assess the relative importance of each driver in province changes, the methodology  
605 from Barton et al.<sup>24</sup> is adopted. For a set N of n provinces (individual provinces or all  
606 provinces together), the probability of presence of each province is recalculated for present  
607 day conditions except for driver d (from the set of drivers D) for which end of the century  
608 condition is used ( $P_n^{\text{future for } d\text{th driver only}}$ ). The set of driver D can be either all drivers  
609 (Fig. 5a,c) or all drivers except SST (Fig. 5b). The relative importance of driver d at a given  
610 grid point for the set N of provinces is computed as follow:

$$611 \quad RI(d) = \frac{\sum_{n \in N} |P_n^{\text{future for } d\text{th driver only}} - P_n^{\text{present}}|}{\sum_{d \in D} \sum_{n \in N} |P_n^{\text{future for } d\text{th driver only}} - P_n^{\text{present}}|}$$

612  $RI(d)$  is computed at grid cells where  $BC > \frac{1}{6}$ ,  $BC$  being calculated with either the set of all  
613 drivers (Fig. 5a,c) or all drivers except SST (Fig. 5b). When  $RI(d)$  is calculated for individual  
614 provinces (Fig. 5c and Supplementary Fig. 16d,e), it is computed only at grid cells where

615  $BC > \frac{1}{6}$  and the concerned province is either *dominant* in present day and/or end of  
616 century conditions.

## 617 **References**

- 618 51. Jaccard, P. Distribution comparée de la flore alpine dans quelques régions des Alpes  
619 occidentales et orientales. *Bull. la Murithienne* (1902).
- 620 52. Aumont, O., Ethé, C., Tagliabue, A., Bopp, L. & Gehlen, M. PISCES-v2: An ocean biogeochemical  
621 model for carbon and ecosystem studies. *Geosci. Model Dev.* (2015). doi:10.5194/gmd-8-  
622 2465-2015
- 623 53. Moore, C. M. *et al.* Processes and patterns of oceanic nutrient limitation. *Nature Geoscience*  
624 (2013). doi:10.1038/ngeo1765
- 625 54. Brun, P., Kiørboe, T., Licandro, P. & Payne, M. R. The predictive skill of species distribution  
626 models for plankton in a changing climate. *Glob. Chang. Biol.* (2016). doi:10.1111/gcb.13274
- 627 55. Redfield, A. C. On the Proportions of Organic Derivatives in Sea Water and Their Relation to  
628 the Composition of Plankton. in *James Johnstone Memorial Volume 1767–192* (Liverpool  
629 Univ. Press, Liverpool, U.K., 1934).
- 630 56. Michelangeli, P. A., Vrac, M. & Loukos, H. Probabilistic downscaling approaches: Application  
631 to wind cumulative distribution functions. *Geophys. Res. Lett.* (2009).  
632 doi:10.1029/2009GL038401
- 633 57. Ridgeway, G. gbm: Generalized Boosted Regression Models. *R Packag. version 1.6-3.1* (2010).
- 634 58. Breiman, L. & Cutler, A. Breiman and Cutler's random forests for classification and  
635 regression. *Packag. 'randomForest'* (2012). doi:10.5244/C.22.54
- 636 59. Venables, W. N. & Ripley, B. D. *Modern Applied Statistics with S Fourth edition by. World*  
637 (2002). doi:10.2307/2685660
- 638 60. Wood, S. N. Stable and efficient multiple smoothing parameter estimation for generalized  
639 additive models. *J. Am. Stat. Assoc.* (2004). doi:10.1198/016214504000000980
- 640 61. Fawcett, T. An introduction to ROC analysis. *Pattern Recognit. Lett.* (2006).  
641 doi:10.1016/j.patrec.2005.10.010
- 642 62. Biecek, P. DALEX: explainers for complex predictive models. *J. Mach. Learn. Res.* **19**, 1–5  
643 (2018).
- 644 63. Vallejos, C. A. Exploring a world of a thousand dimensions. *Nature Biotechnology* (2019).  
645 doi:10.1038/s41587-019-0330-9
- 646 64. L., K. & P., R. Clustering by means of Medoids. in *Statistical Data Analysis Based on the L1*  
647 *Norm and Related Methods* (1987).

- 648 65. Rousseeuw, P. J. Silhouettes: A graphical aid to the interpretation and validation of cluster  
649 analysis. *J. Comput. Appl. Math.* (1987). doi:10.1016/0377-0427(87)90125-7
- 650 66. Orsi, A. H., Whitworth, T. & Nowlin, W. D. On the meridional extent and fronts of the Antarctic  
651 Circumpolar Current. *Deep. Res. Part I* (1995). doi:10.1016/0967-0637(95)00021-W
- 652 67. Hubert, L. & Arabie, P. Comparing partitions. *J. Classif.* (1985). doi:10.1007/BF01908075
- 653 68. Somerfield, P. J. Identification of the Bray-Curtis similarity index: Comment on Yoshioka  
654 (2008). *Marine Ecology Progress Series* (2008). doi:10.3354/meps07841
- 655 69. Bloom, S. Similarity Indices in Community Studies: Potential Pitfalls. *Mar. Ecol. Prog. Ser.*  
656 (1981). doi:10.3354/meps005125
- 657 70. Watson, R. A. A database of global marine commercial, small-scale, illegal and unreported  
658 fisheries catch 1950-2014. *Sci. Data* (2017). doi:10.1038/sdata.2017.39
- 659 71. Flanders Marine Institute (2018). Maritime Boundaries Geodatabase: Maritime Boundaries  
660 and Exclusive Economic Zones (200NM), version 10. (2018).  
661 doi:<https://doi.org/10.14284/313>.  
662

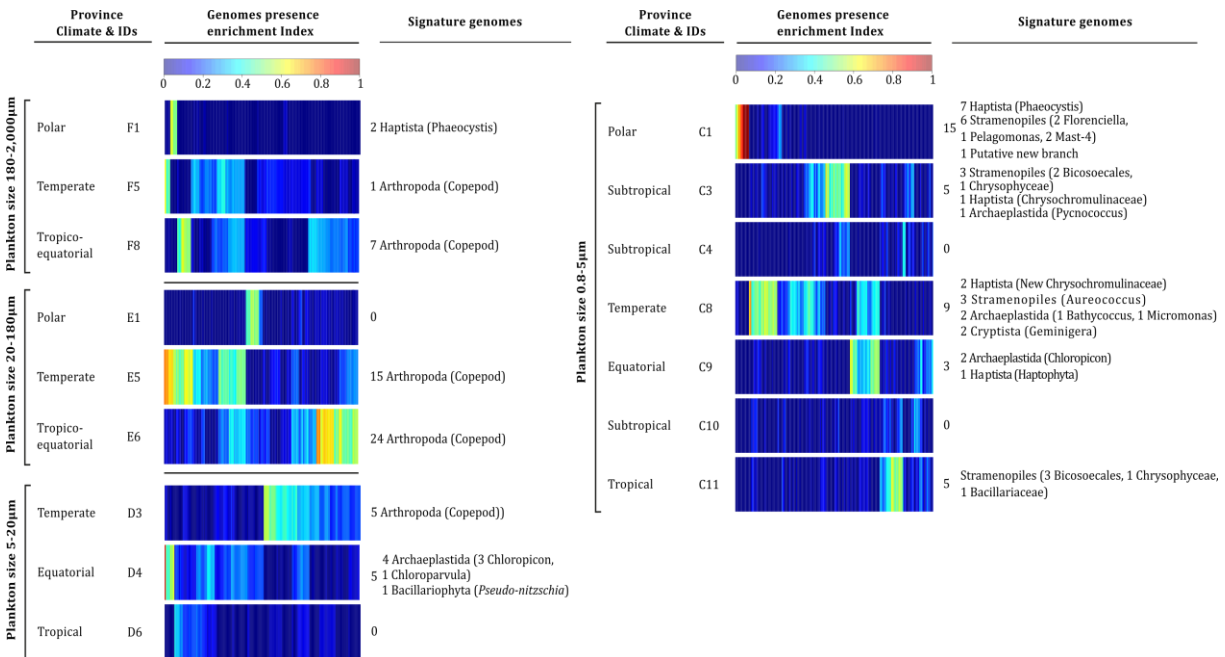

663

664 **Fig. 1 | Signature genomes of provinces of eukaryotes enriched size classes.** For each plankton  
 665 size class, indexes of presence enrichment for 713 genomes of eukaryotic plankton<sup>38</sup> in  
 666 corresponding provinces are clustered and represented in a color scale. Signature genomes  
 667 (see *Methods*) are found for almost all provinces, their number and taxonomies are summarized  
 668 (detailed list in Supplementary Table 6).

669

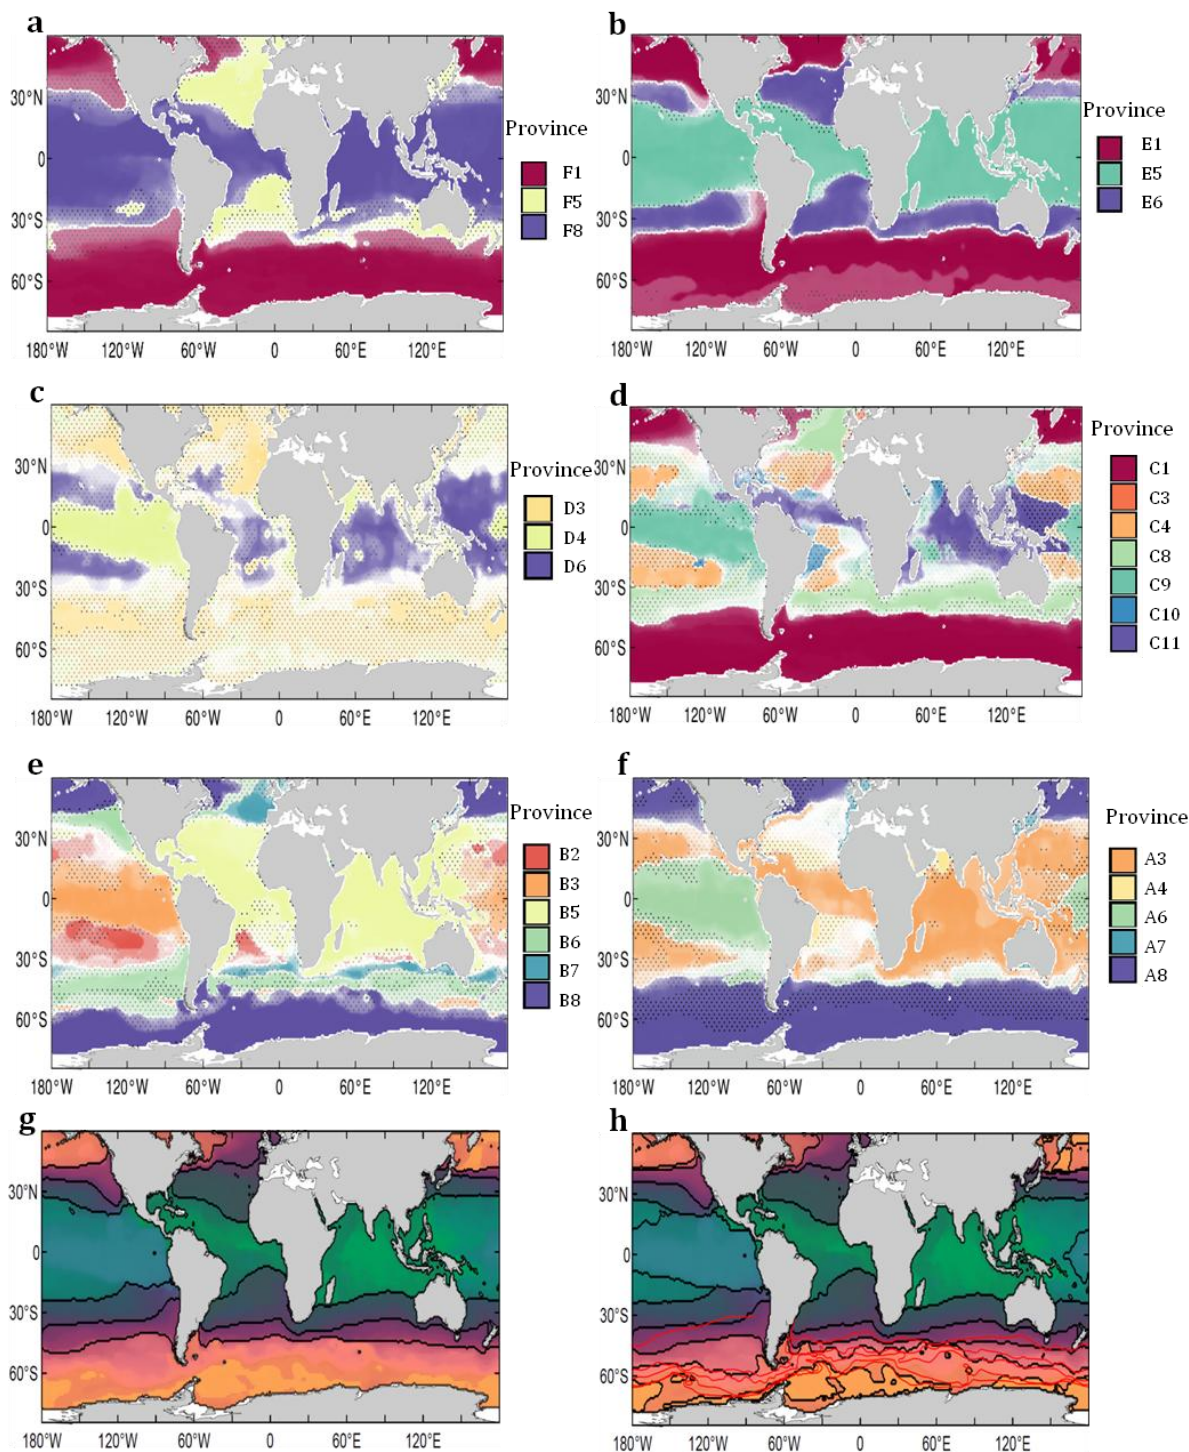

670 **Fig. 2 | Global biogeographies of size-structured plankton provinces projected on WOA2013**  
 671 **dataset.** (a) Metazoans enriched (180-2000  $\mu\text{m}$ ) (b) Small metazoans enriched (20-180  $\mu\text{m}$ ) (c)  
 672 Small eukaryotes enriched (5-20  $\mu\text{m}$ ) (d) Small eukaryotes enriched (0.8-5  $\mu\text{m}$ ) (e) Bacteria  
 673 enriched (0.22-3  $\mu\text{m}$ ) (f) Viruses enriched (0-0.2  $\mu\text{m}$ ). (a-f) Dotted areas represent uncertainty  
 674 areas where the delta of presence probability of the dominant province and an other (from the



675 same size fraction) is inferior to 0.5. **(g)** Combined size class biogeography using PHATE algorithm  
676 partitioned in 4 clusters. Areas of uncertainty are highlighted with dotted lines. **(h)** Combined size  
677 class biogeography using PHATE algorithm partitioned in 7 clusters overlaid with Antarctic  
678 Circumpolar Current boundaries (red). Simple biogeographies are observed in large size fractions  
679 ( $>20\ \mu\text{m}$ ) with a partitioning in three major oceanic areas: tropico-equatorial, temperate and polar.  
680 More complex geographic patterns and patchiness are observed in smaller size fractions with the  
681 distinction of pacific equatorial provinces and provinces associated to oligotrophic tropical gyres.  
682

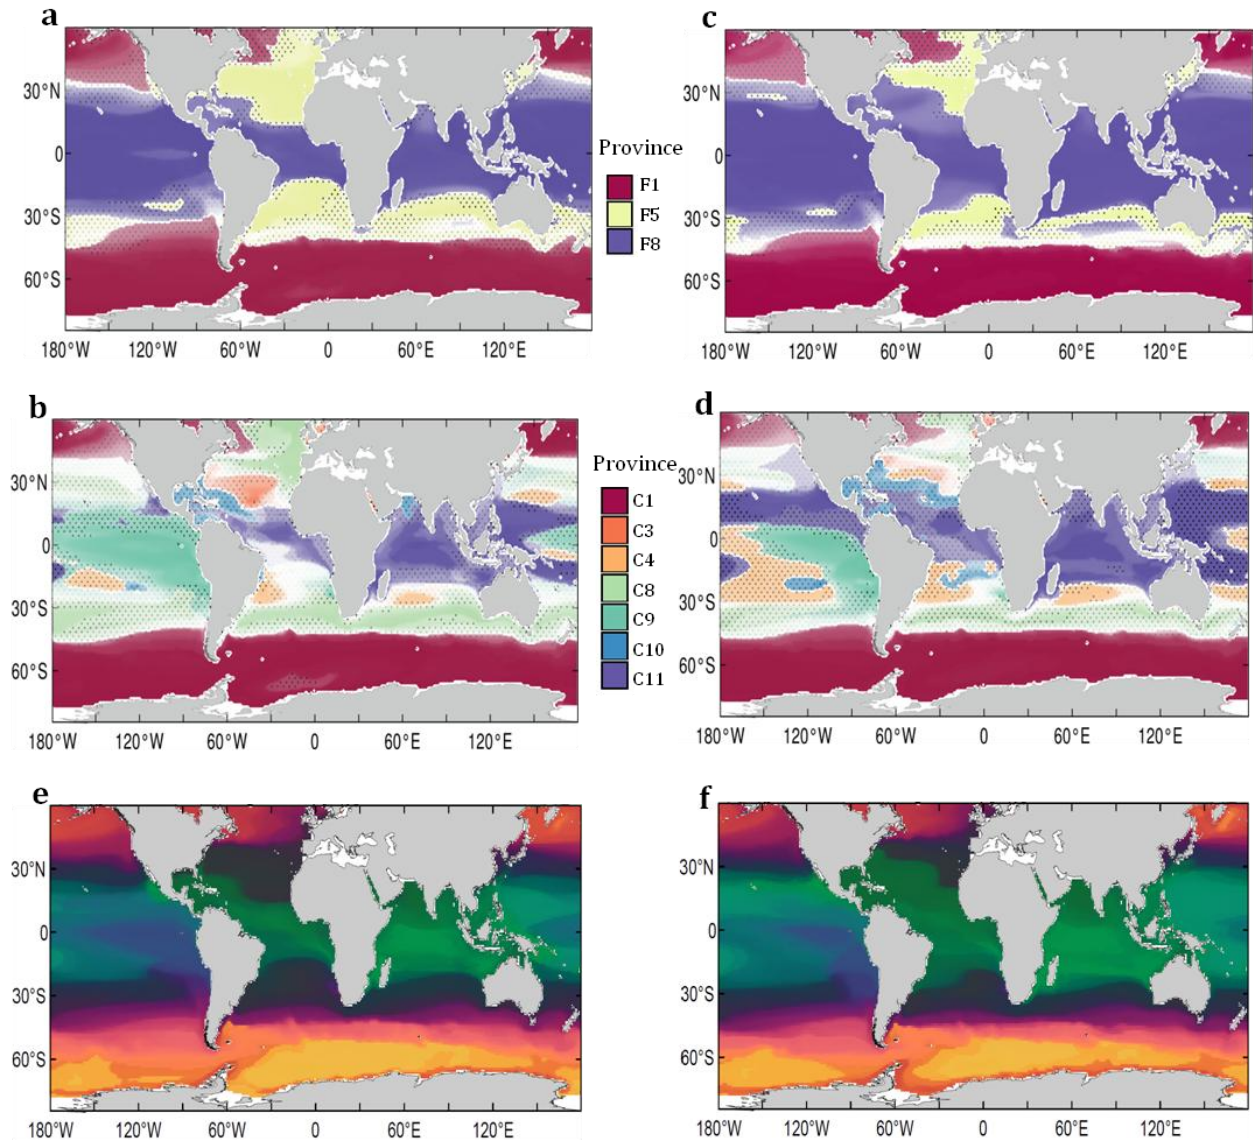

683 **Fig. 3 | Global biogeography of small metazoans enriched size fraction (180-2000  $\mu\text{m}$ ),**  
684 **protists enriched (0.8-5  $\mu\text{m}$ ) and combined size classes in modeled present day (a, c, e) and**  
685 **end of the century (b, d, f). (a-d)The dominant niche *i.e.* the one predicted to have the highest**  
686 **probability of presence is represented at each grid point of the map. The color transparency is the**  
687 **probability of presence of the dominant niche. A simple biogeography is observed for size fraction**  
688 **180-2000  $\mu\text{m}$  (a, b) with a polar niche, a temperate and a tropico-equatorial niche. Biogeography of**  
689 **size fraction 0.8-5  $\mu\text{m}$  size fraction is more complex and patchy with several temperate and tropical**  
690 **niches (c, d). Biogeography of large size plankton and small size plankton are therefore decoupled.**  
691 **Climate change impacts tropical niches which are expanding towards the poles in both size**  
692 **fractions with a more complex behavior in size fraction 0.8-5  $\mu\text{m}$  (b and d). (e, f) Present and end of**  
693 **century combined size classes using PHATE algorithm.**

694

695

| Size fraction ( $\mu\text{m}$ ) | Present day covered area (%) | End of century covered area (%) | % area with a change of dominant province | Most frequent transition             | %  | 2 <sup>nd</sup> most frequent transition | %  |
|---------------------------------|------------------------------|---------------------------------|-------------------------------------------|--------------------------------------|----|------------------------------------------|----|
| 180-2000                        | 74                           | 74                              | 13                                        | temperate->tropico-equatorial (5->8) | 67 | polar->temperate (1->5)                  | 14 |
| 20-180                          | 78                           | 77                              | 12                                        | temperate->tropico-equatorial (6->5) | 67 | polar->temperate (1->6)                  | 29 |
| 5-20                            | 45                           | 49                              | 22                                        | temperate -> equatorial (3->4)       | 47 | equatorial -> tropical (4->6)            | 25 |
| 0.8-5                           | 56                           | 59                              | 31                                        | equatorial -> tropical (9->11)       | 22 | temperate -> equatorial (8->9)           | 15 |
| 0.22-3                          | 60                           | 61                              | 15                                        | temperate-> tropical (7->5)          | 22 | polar -> temperate (8->6)                | 16 |
| 0-0.2                           | 64                           | 66                              | 16                                        | equatorial -> tropical (6->3)        | 32 | temperate -> equatorial (8->6)           | 31 |
| <b>Total</b>                    |                              |                                 | <b>60</b>                                 |                                      |    |                                          |    |

696 **Table 1 | Global statistics of covered areas and provinces' changes and transitions.** From 12 %  
697 to 31% of the total covered area is estimated to be replaced by a different province at the end of the  
698 century compared to present day depending on the size fraction. In total, considering all size  
699 fractions this represents 60 % of the total covered area with at least one predicted change of  
700 dominant province across the six size fractions.

701

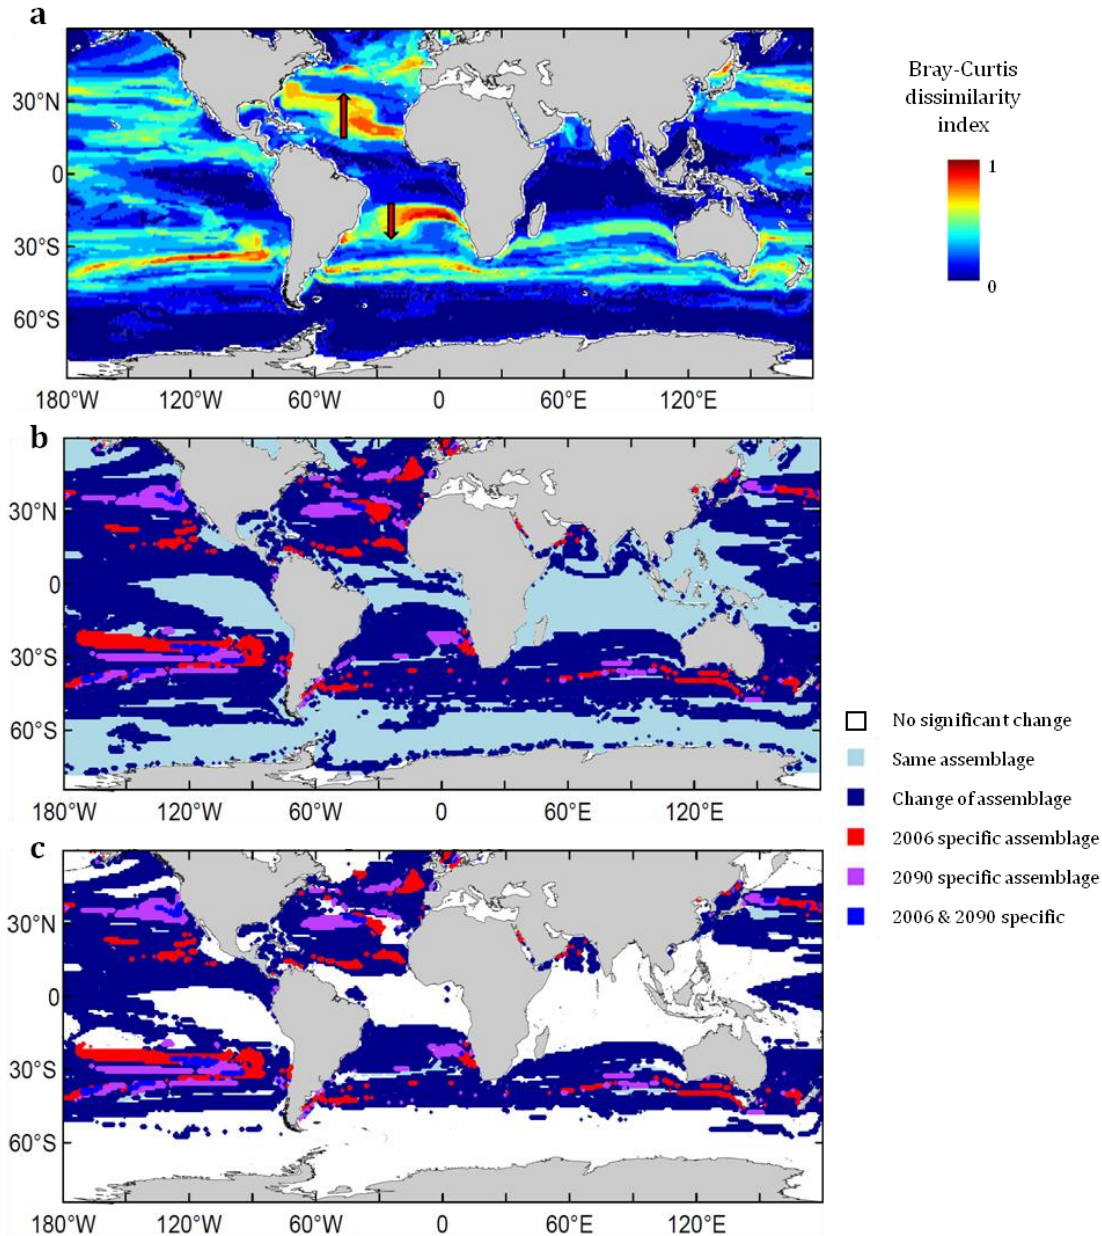

702 **Fig. 4 | (a) Bray-Curtis dissimilarity index map comparing present day with end of the**  
703 **century projections of dominant provinces. Maps of trans-kingdom assemblages**  
704 **reorganization of dominant provinces (b) and with a criterion of significance (c). (a) Bray-**  
705 **Curtis dissimilarity index is calculated by integrating all the dominant provinces presence**  
706 **probabilities over the six size fraction. Most important changes appear in subtropical, temperate**  
707 **and subpolar regions. These changes are due to the displacement of tropical and temperate**  
708 **provinces towards the pole but also the geographical decoupling between large and small size**  
709 **plankton. The mean change in niche dissimilarity index is 0.25. (b) An assemblage is the combined**  
710 **projected presence of the dominant province of each size class. Assemblage reorganization (present**

711 day versus end of the century) is either mapped on all considered oceans or with a criterion on the  
712 Bray-Curtis dissimilarity index ( $BC > 1/6$ , see *Materials and Methods*) (c). Depending on the  
713 criterion from 60.1 % (b, dark blue) to 48.7 % (c, dark blue) of the oceanic area is projected to  
714 change of assemblage. New assemblage are expected to appear in 2090 (purple+blue) whereas  
715 some 2006 specific assemblages are projected to disappear (red+blue). New assemblages as well as  
716 lost assemblages are mostly found in temperate, subtropical and tropical regions where most of the  
717 rearrangements are projected.

718

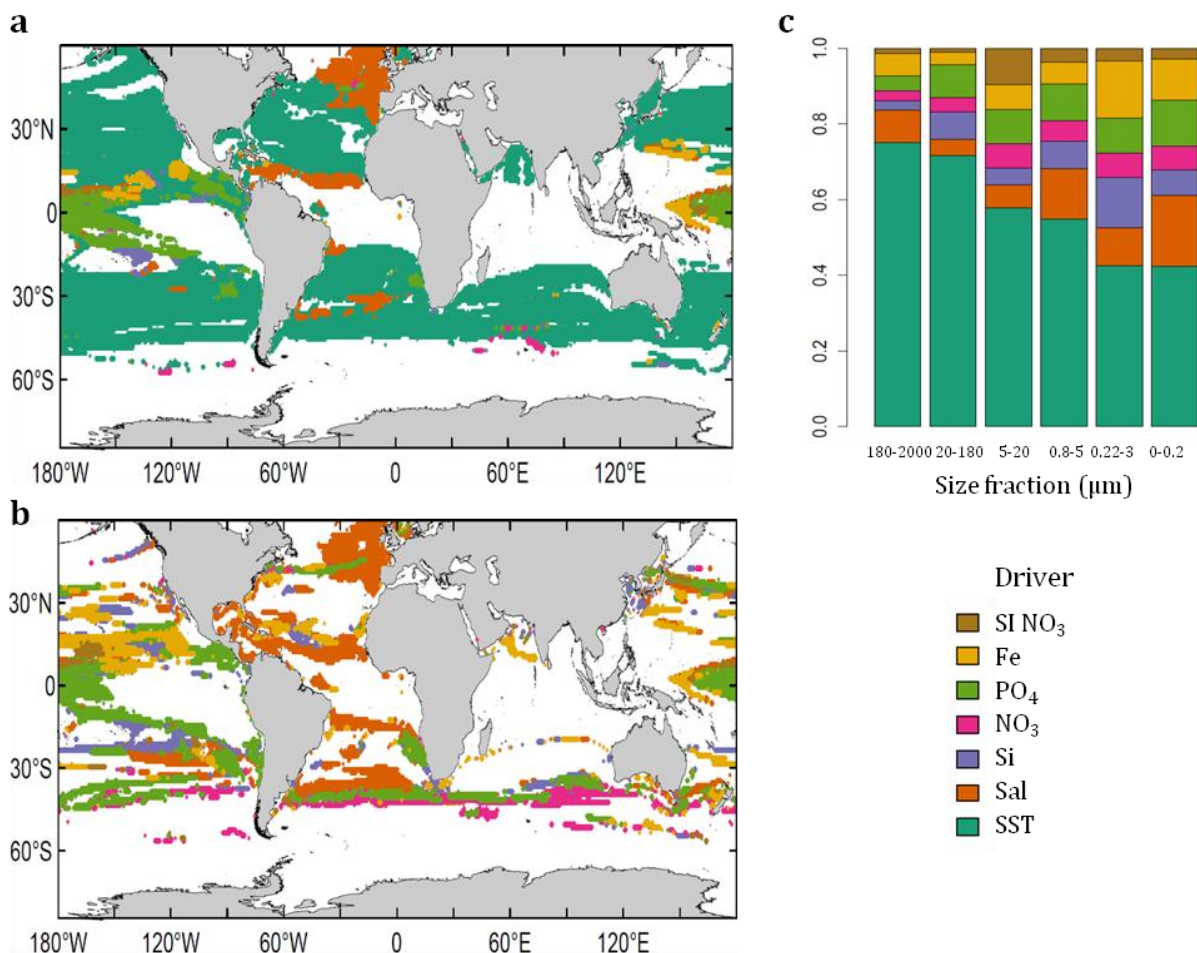

719 **Fig. 5 | Map of most impacting drivers on dominant province changes (a), most impacting**  
720 **driver without considering temperature change (b) and relative importance of the drivers in**  
721 **the different size fractions (c). (a)** Temperature appears as the top impacting driver on the  
722 majority of the projected ocean with a significant change of province (Fig. 4). **(b)** Salinity and  
723 dissolved phosphate are found to be the second and third driver of province reorganization notably  
724 at tropical and subpolar latitudes. Note the importance of nitrate at temperate southern latitudes.  
725 **(c)** Temperature is found to be the most important driver for all size classes but has a more  
726 important impact in large size classes (>20 μm). Nutrients have on average a relative more  
727 important impact in small size classes in driving provinces reorganization.

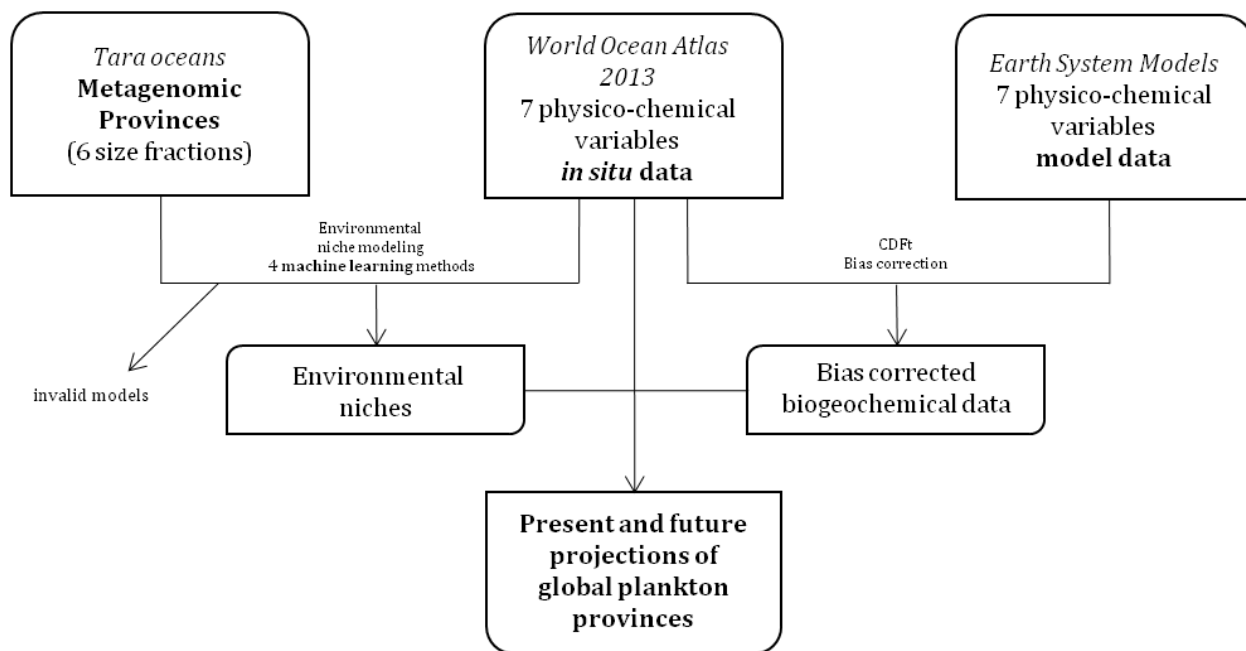

728  
729 **Supplementary Fig. 1 | Study pipeline.** Metagenomic data from the 2009-2013 *Tara Oceans*  
730 expedition and *in situ* measurements of physicochemical variables (*World Ocean Atlas 2013*,  
731 WOA13)<sup>1</sup> are combined to define environmental niches at the plankton community level across 6  
732 size fractions of the plankton realm. Bias corrected outputs from a mean model of 6 Earth System  
733 Models<sup>2-7</sup> and WOA13 data are then used to project global plankton provinces for present day  
734 conditions and end of the century conditions under a high emission climate change scenario  
735 (RCP8.5)<sup>8</sup>. Physico-chemical variables are Sea Surface Temperature (SST), Salinity (Sal), Dissolved  
736 silica (Si), Nitrate (NO<sub>3</sub>), Phosphate (PO<sub>4</sub>), Iron (Fe) and a seasonality index of nitrate (SI NO<sub>3</sub>).

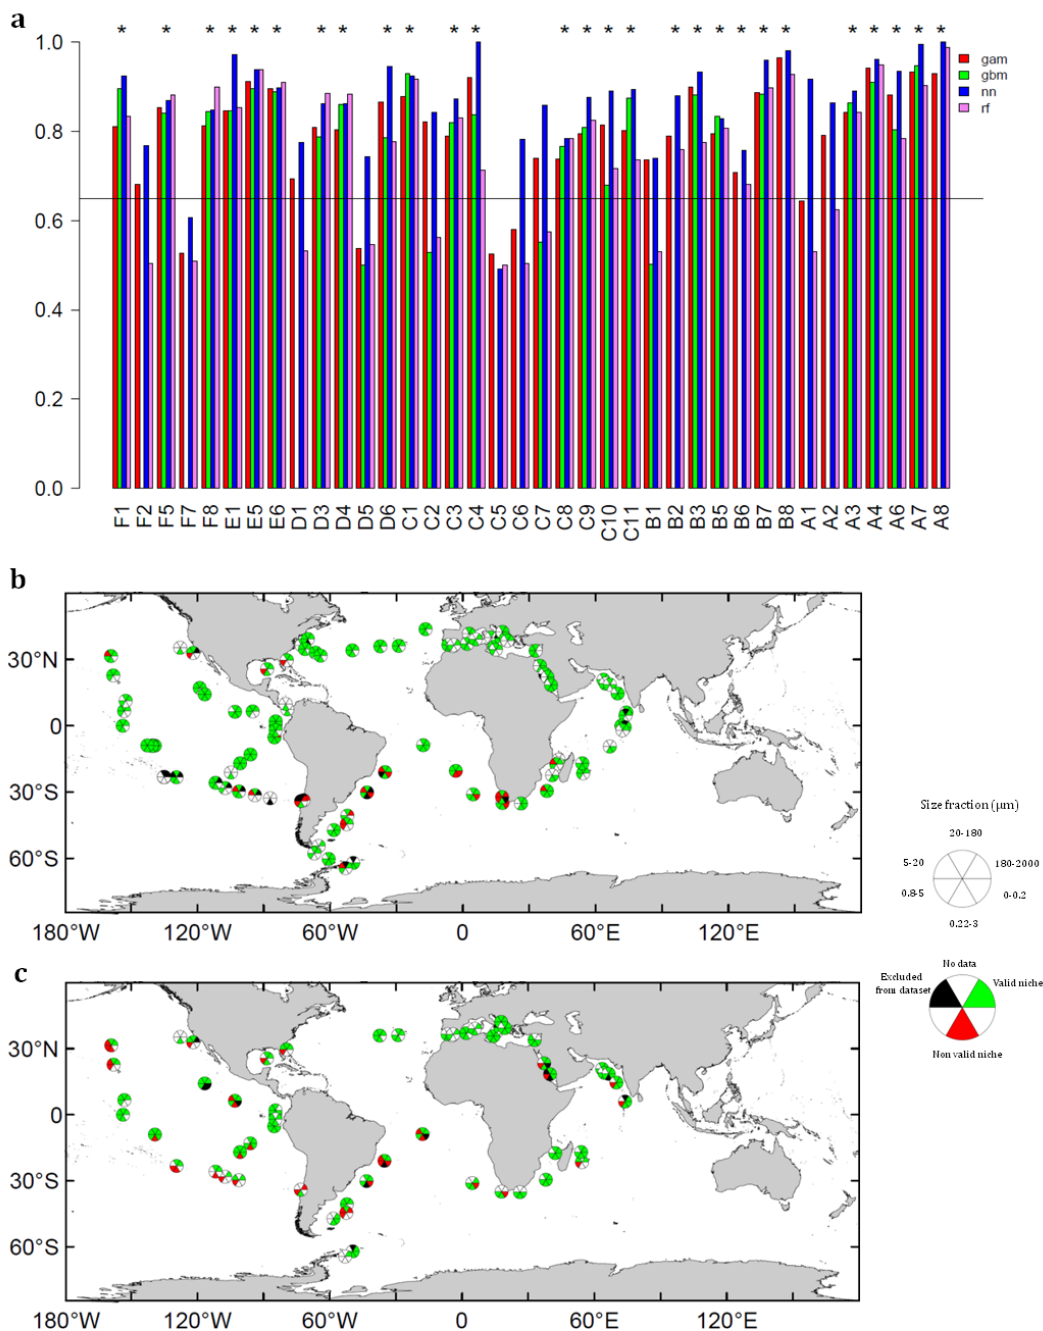

737 **Supplementary Fig. 2 | (a) Barplot of mean AUC over 30-fold cross validation process of the**  
 738 **38 initial metagenomic provinces. (b,c) Map of validated and non validated stations across**  
 739 **the six size fractions in surface samples (b) and DCM samples (c). (a) Mean AUC (Area Under**  
 740 **the receiver operating Characteristic)<sup>9</sup> is plotted for the best hyperparameter combination of the 4**  
 741 **machine learning techniques used for each of the 38 metagenomic provinces. General Additive**  
 742 **Models<sup>10</sup> (gam) are shown in red (no optimization), Gradient Boosting Machines<sup>11</sup> (gbm) in green,**  
 743 **fully connected Neural Networks<sup>12</sup> (nn) in blue and Random Forest<sup>13</sup> models in purple (rf). A star**



744 for valid models is drawn at the top of each considered valid model. A model is validated when at  
745 least 3 out of the four models have a mean AUC superior to 0.65. A valid model is found for 27 out of  
746 38 initial provinces. Out of the 27 validated models 4 are not valid for the gbm method. (b-c) For  
747 each Tara sample present in the dataset at surface (b) or Deep Chlorophyll Maximum (DCM) (c) and  
748 for each size fraction, the filter (one size fraction at one location and one depth) belongs either to a  
749 validated niche (green), a non validated niche (red), an excluded filter (sea Materials & Methods)  
750 (black) or no data is available (white). Non validated niches represent only 11 % of filters present  
751 in the dataset (66 out of 595).

752

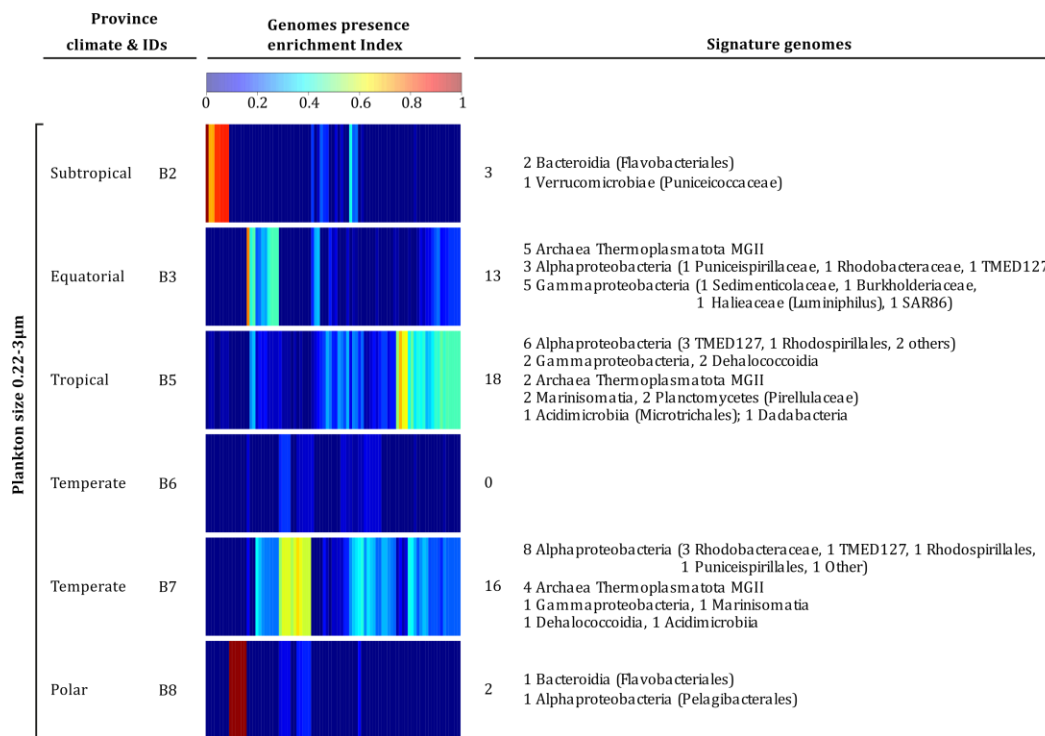

753 **Supplementary Figure 3 | Signature genomes of provinces of the prokaryotes enriched size.**

754 Indexes of presence enrichment<sup>14</sup> for 523 genomes of prokaryotic plankton<sup>15</sup> in corresponding  
 755 provinces are clustered and represented in a color scale. Signature genomes (see *Methods*) are  
 756 found for almost all provinces, their number and taxonomies are summarized (detailed list in  
 757 Supplementary Table 6).

758

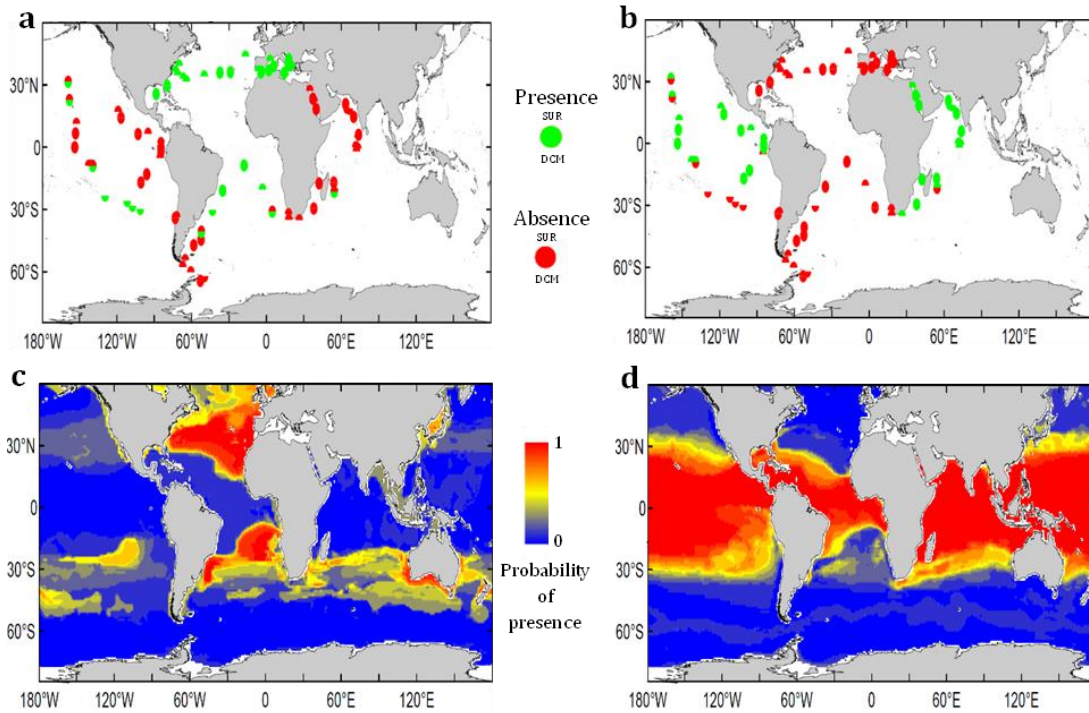

759 **Supplementary Fig. 4 | Sampling and projection maps on WOA13 climatological data of two**  
760 **example provinces from size fraction 180-2000  $\mu\text{m}$ .** (a) Sampling map of province F5. (b)  
761 Province F8. (c) Projection map of province F5 on WOA13<sup>1</sup>. (d) Province F8. Qualitatively,  
762 projection maps are coherent with sampling maps of the two provinces with the highest probability  
763 of presence projected in the sampling regions. Other presence zones are also predicted by the  
764 projection. Sampling of these zones might be interesting to confirm our approach and projections  
765 such as South of Australia where a high probability of presence for province F5 is predicted.

766

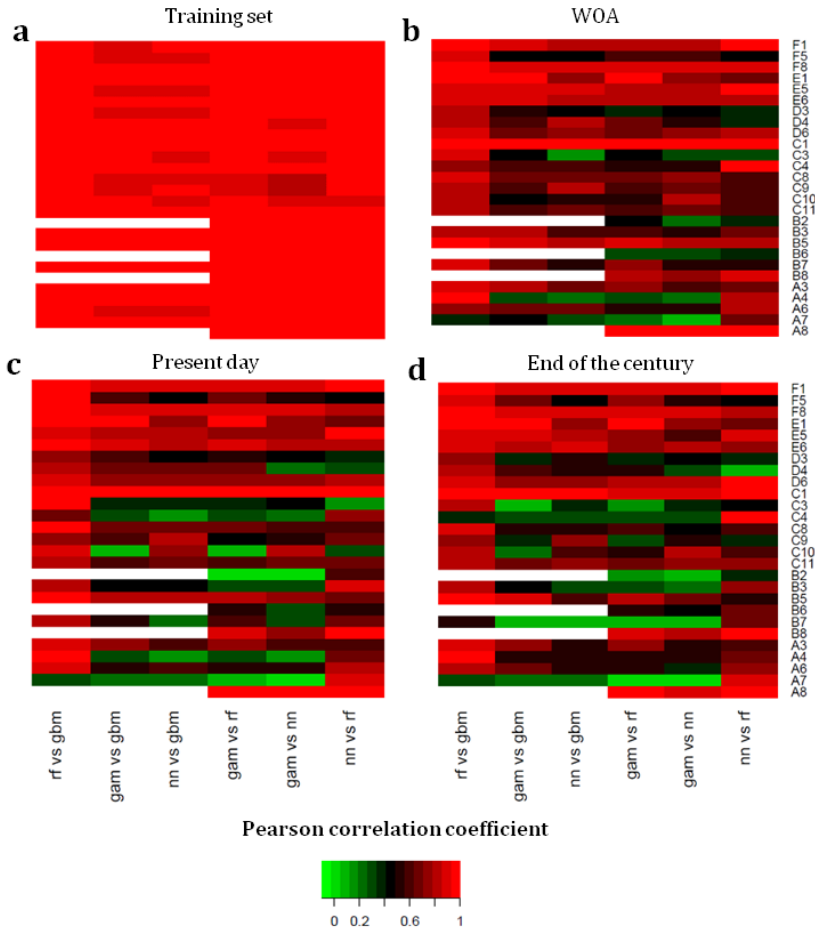

767 **Supplementary Fig. 5 | Pairwise Pearson correlation coefficient heat maps between outputs**  
 768 **of the 4 machine learning models.** rf: Random Forest, gbm: gradient boosting machines, gam:  
 769 general additive models, nn: neural networks. In rows are the provinces of the different size  
 770 fractions. In columns are the pairwise comparisons of each machine learning technique. (a)  
 771 Training set outputs. (b) WOA13 average data (except for Iron, PISCES-v2<sup>16</sup> is used) projection  
 772 outputs. (c) Present day data projection outputs (bias corrected mean model of 6 Earth System  
 773 Models). (d) End of the century projection outputs. On the training set, models are in agreement  
 774 with most of the correlation coefficients superior to 0.9. A drop of correlation is observed for  
 775 modeled data (c, d) especially in small size fractions. This shows modeled data are more distant  
 776 from the training set than WOA data. Random Forest and Gradient Boosting Machine are in very  
 777 good agreement (first columns) which could be expected as they are both based on multiple  
 778 decision trees.

779

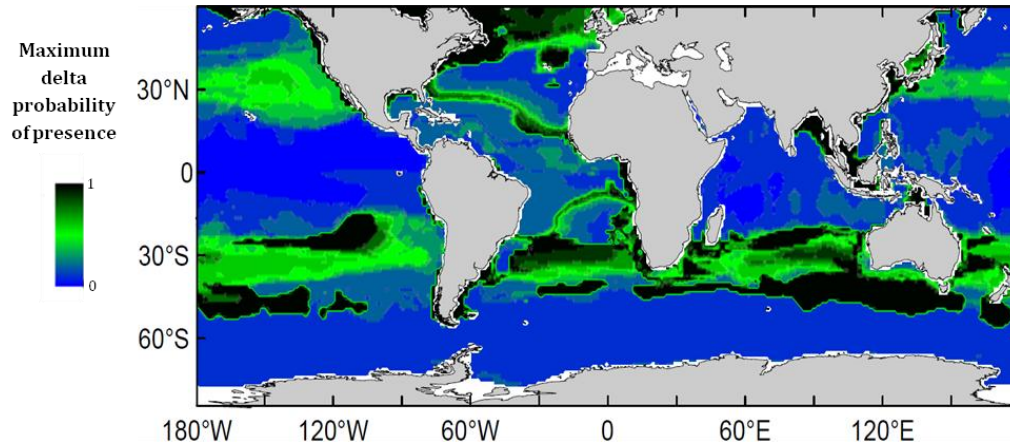

780 **Supplementary Fig. 6 | Probability range map (WOA data) of province F5 of size fraction 180-**  
781 **2000  $\mu\text{m}$ .** At each point of the grid, the maximum delta probability of presence between the 4  
782 machine learning projections is calculated. In black are the zones where two models completely  
783 disagree: one model predicts presence with certainty whereas the other predicts absence with  
784 certainty. Disagreement appears mostly in uncertain presence areas (Supplementary Fig. 3c)  
785 whereas models are generally in good agreement in absence areas (blue zones).

786

787

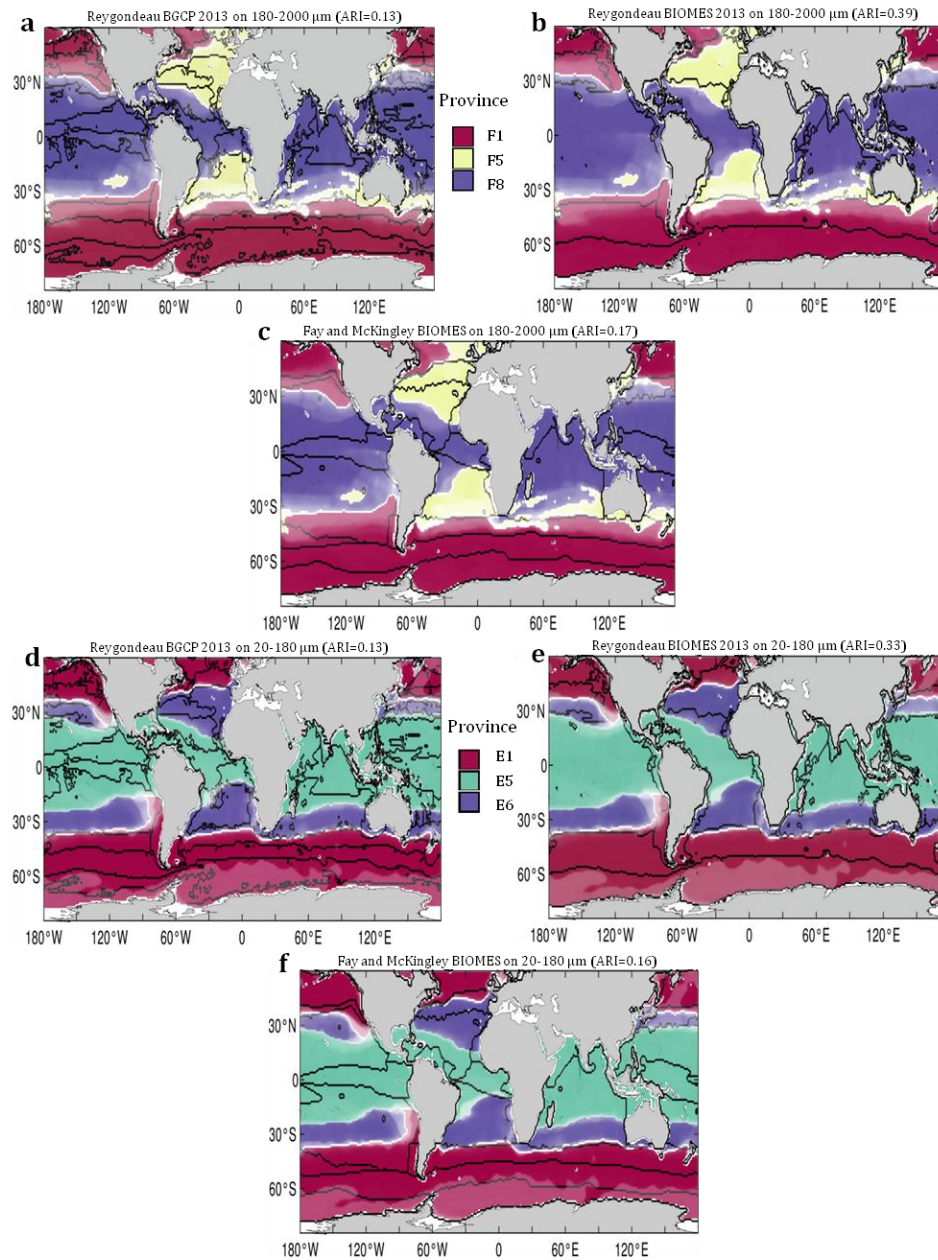

788

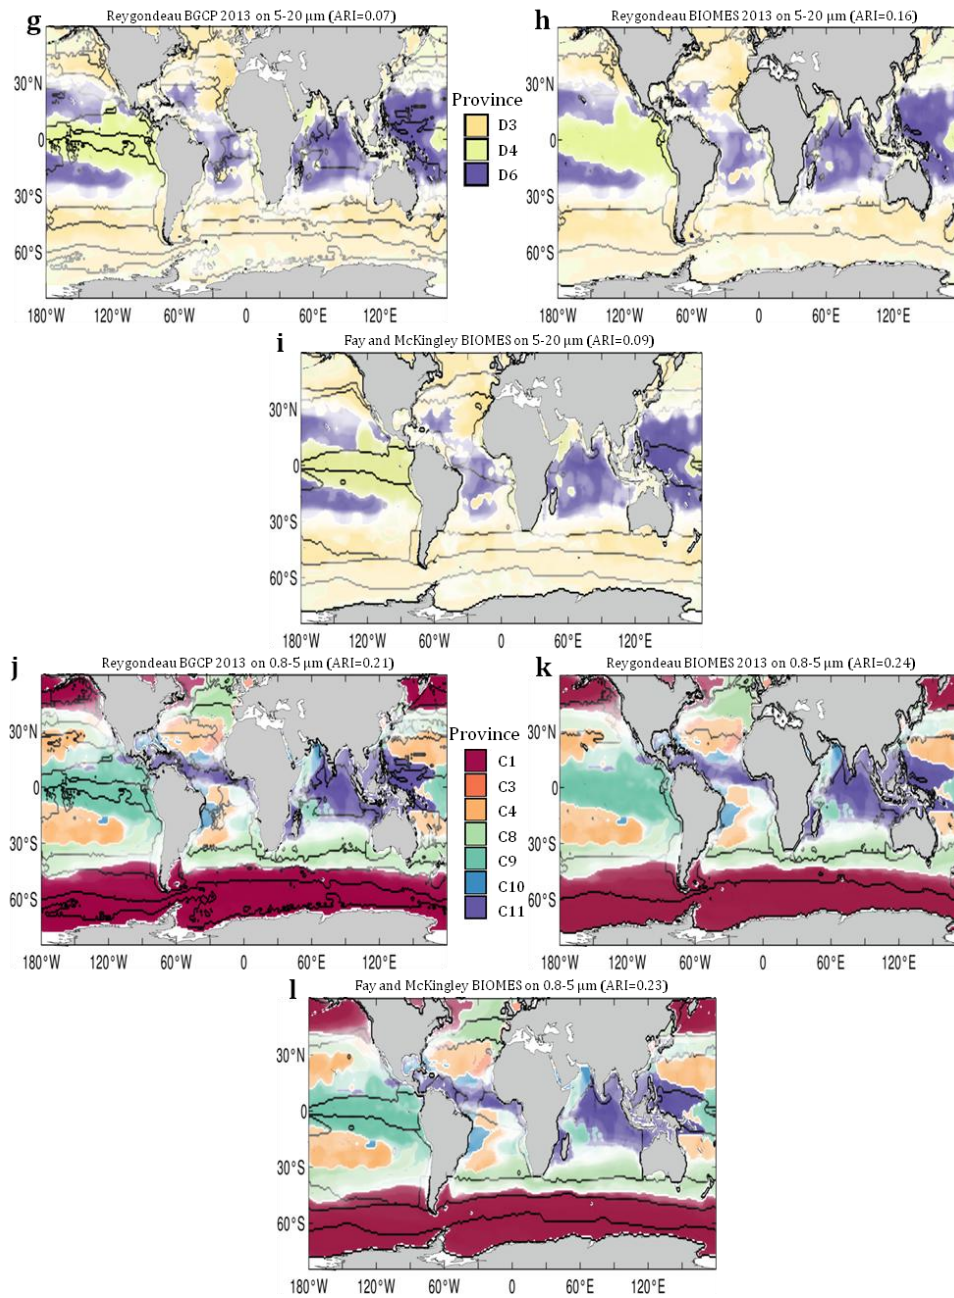

789

790

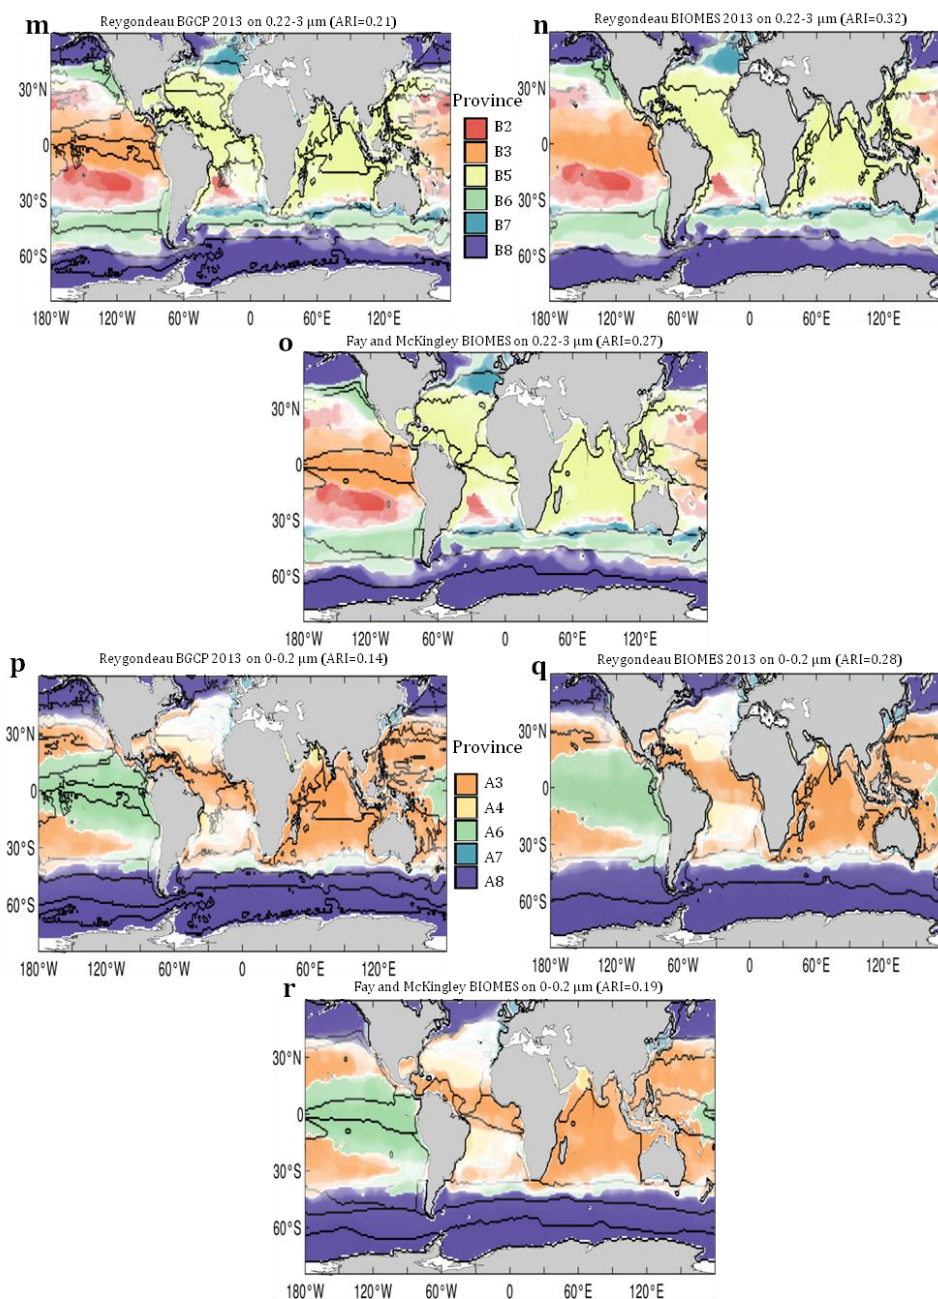

791 **Supplementary Fig. 7 | Three existing oceanic partitions overlaid on top of plankton**

792 **provinces for the six fractions and combined size fractions.** The three oceanic partitions are

793 Reygondeau et al. Biogeochemical Provinces (BGCP)<sup>17</sup>; Reygondeau et al. Biomes<sup>17</sup>; Fay and

794 McKingley Biomes<sup>18</sup>. Each partitioning mask is overlaid in the above order on top of plankton

795 provinces for the six size fractions. **(a-c)** 180-2000 μm **(d-f)** 20-180 μm **(g-i)** 5-20 μm **(j-l)** 0.8-5

796 μm **(m-o)** 0.22-3 μm and **(p-r)** 0-0.2 μm. Above all maps, the adjusted rand index (ARI), an index

797 used to compare partitions, comparing mapped biogeographies with the black lines mask is shown.

798



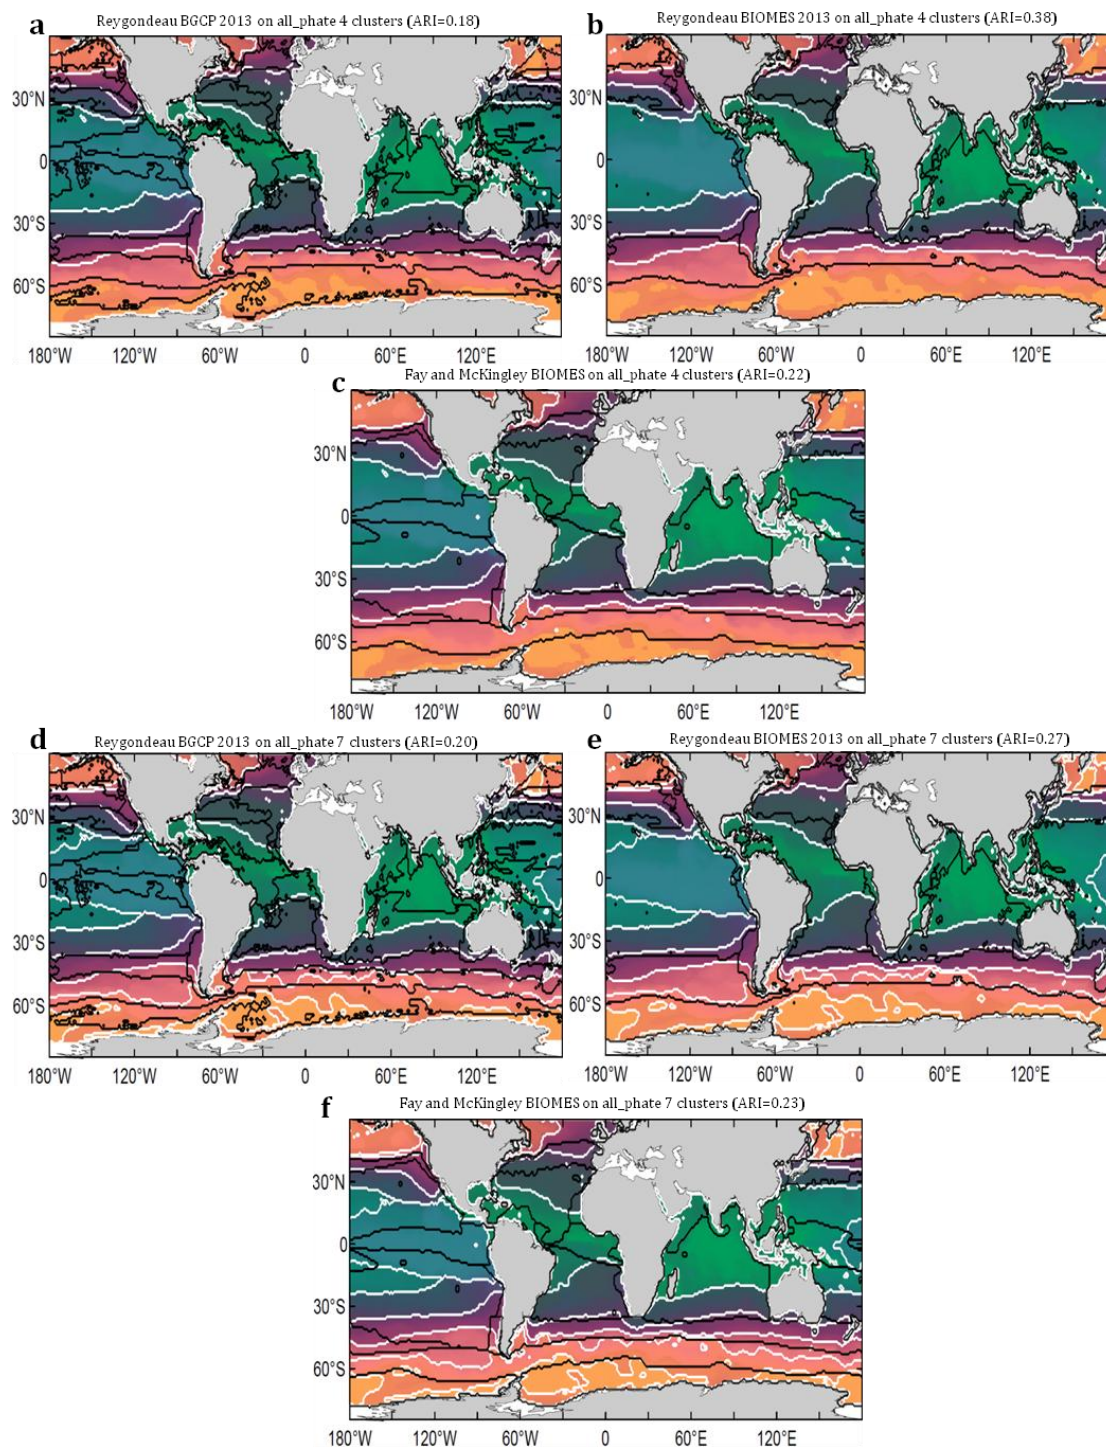

799 **Supplementary Fig. 8 | Three existing oceanic partitions overlaid on top of plankton**  
800 **provinces for the combined size fractions.** The three oceanic partitions are Reygondeau et al.<sup>17</sup>  
801 Biogeochemical Provinces (BGCP); Reygondeau et al. Biomes<sup>17</sup>; Fay and McKingley Biomes<sup>18</sup>. Each  
802 partitioning mask is overlaid in the above order on top of size fraction plankton provinces  
803 combined by the PHATE algorithm in (a-c) 4 clusters and (d-f) 7 clusters.

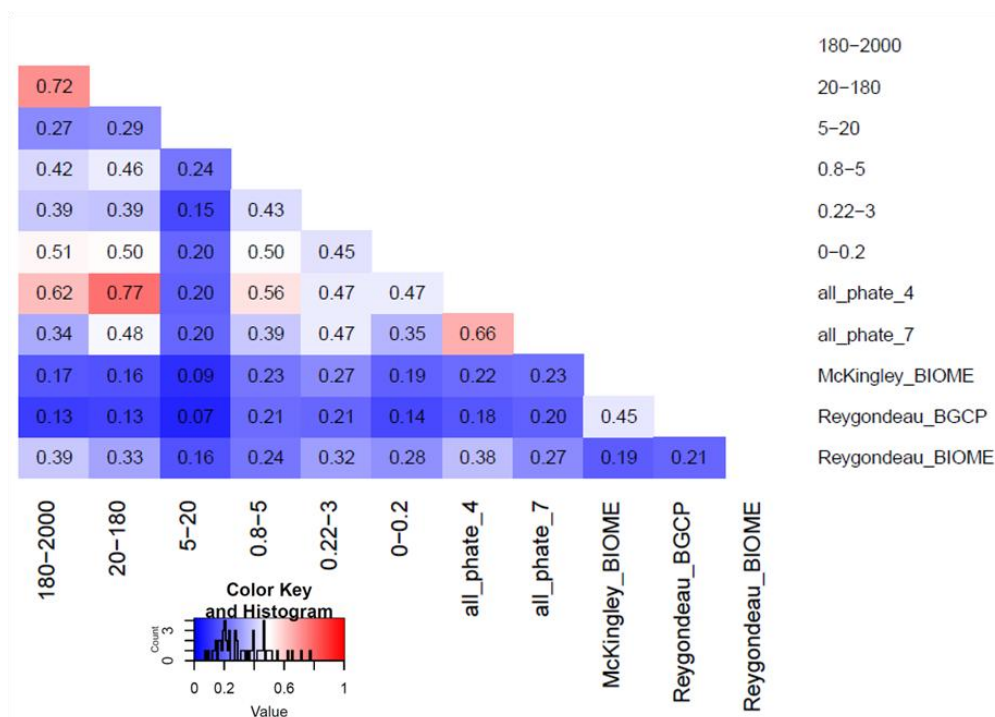

804 **Supplementary Fig. 9 | Pairwise comparisons of ocean partitions based on plankton**  
 805 **provinces and existing biogeochemical partitions.** The three oceanic partitions are Reygondeau  
 806 et al.<sup>17</sup> Biogeochemical Provinces (BGCP); Reygondeau et al. Biomes<sup>17</sup>; Fay and McKingley Biomes<sup>18</sup>.  
 807

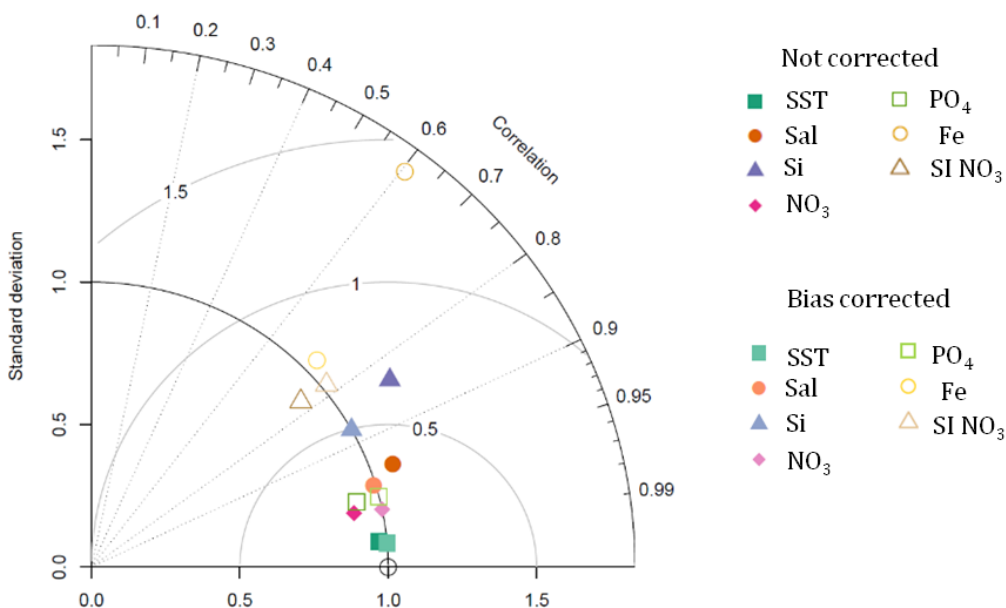

808 **Supplementary Fig. 10 | Taylor diagram exhibiting statistical comparison of WOA 2013**  
809 **observations and present day ESM model mean of the different drivers.** Each variable is  
810 centered and scaled according to the mean and standard deviation of the observed variable (black  
811 circle point at standard deviation 1 on the x-axis). Dark color points are the ESM model mean  
812 without Cumulative Distribution Function transform (CDFt<sup>19</sup>) bias correction. They are to be  
813 compared with light color points for which the bias correction is performed. Overall, good spatial  
814 correlations are found between the model mean and the observations. CDFt bias correction  
815 performs well by bringing standard deviations of the model to the observed standard deviations  
816 without decreasing correlations.

817

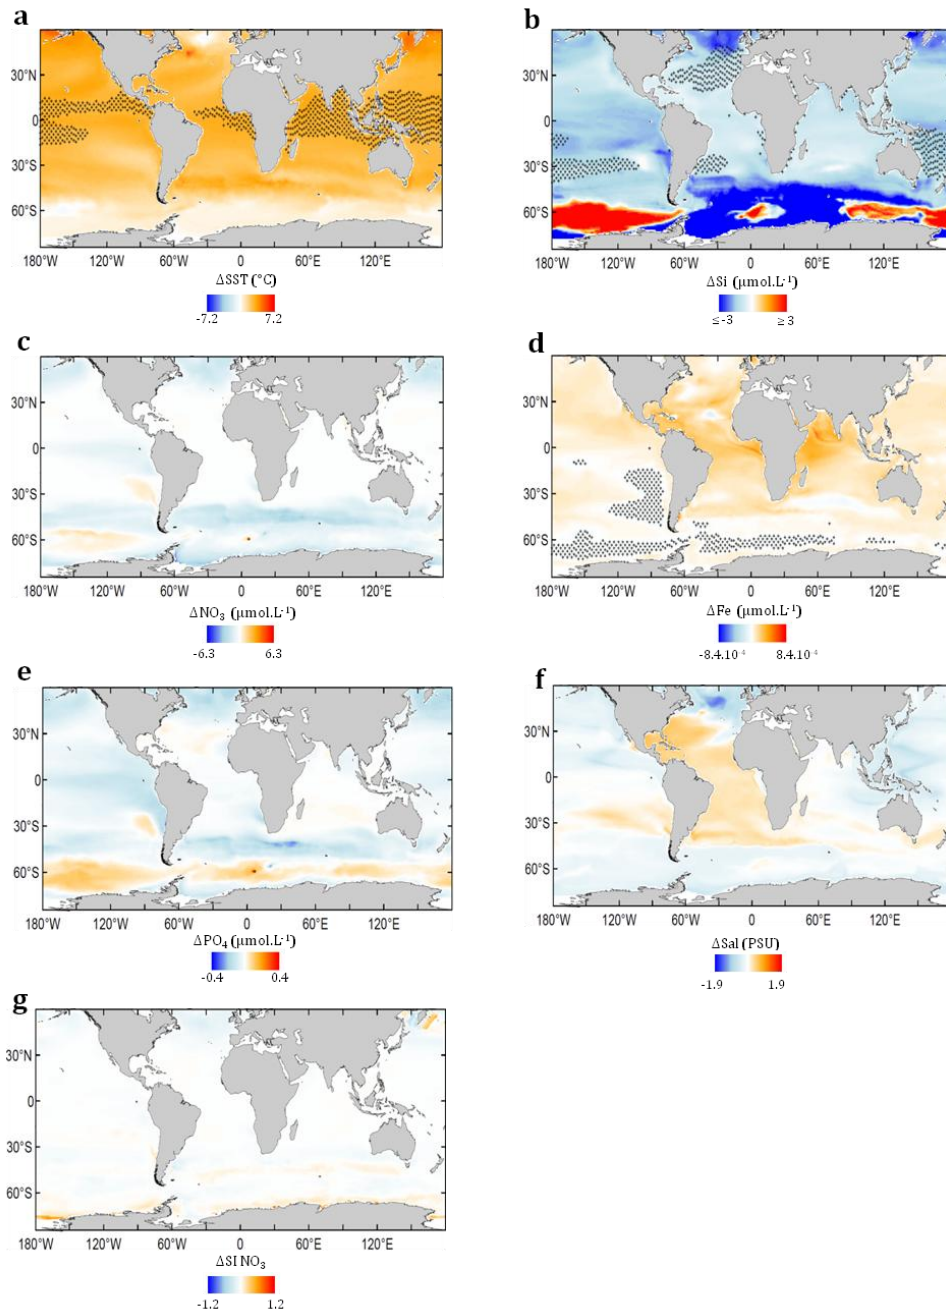

818 **Supplementary Fig. 11 | Differences in drivers' intensity (2090/99-2006/15) in the bias**  
819 **corrected ESM model-mean under RCP8.5. (a) Sea Surface Temperature (SST). (b) Dissolved**  
820 **silica. (c) Nitrate. (d) Iron. (e) Phosphate. (f) Salinity (Sal). (g) Seasonality Index of Nitrate (SI NO<sub>3</sub>).**  
821 Note that the scale for dissolved silica variations is restricted to visualize small variations. Regions  
822 for which out of range values (*i.e.* inferior to the minimum or superior to the maximum found in  
823 2006-15) are reached at the end of the century are highlighted with small stars reflecting high  
824 uncertainty zones for machine learning approaches.

825

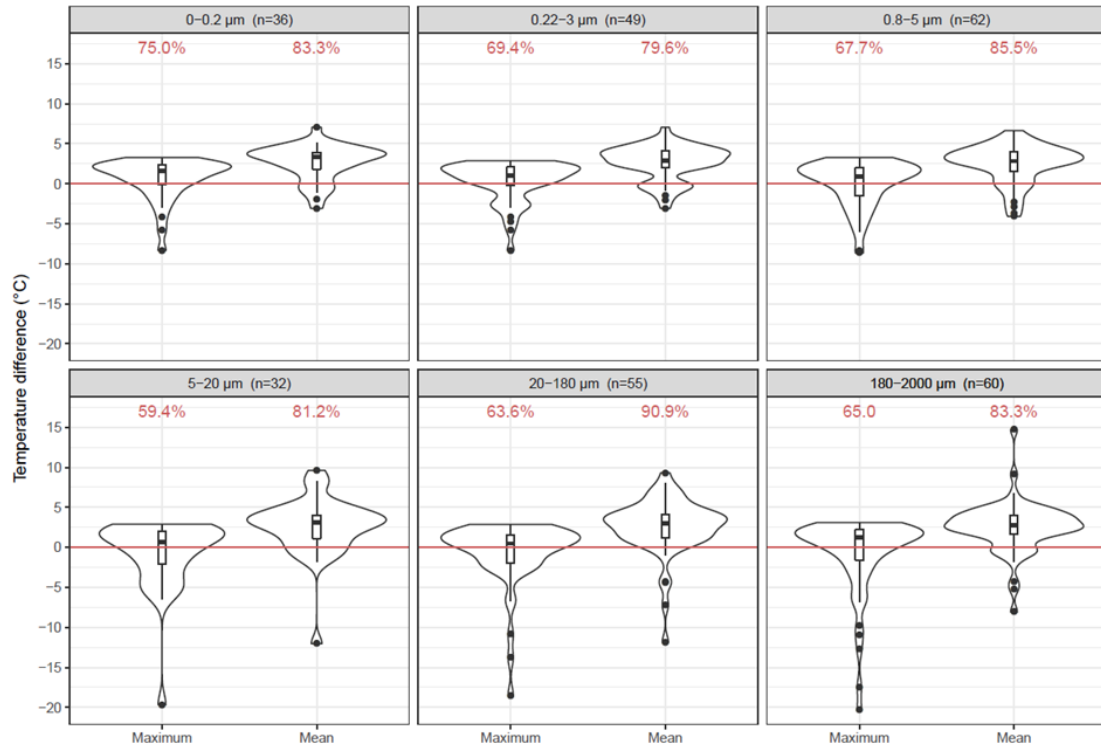

826 **Supplementary Fig. 12 | Distribution of deltas between future temperature at each sampling**  
827 **site minus either the mean or maximum temperature within their contemporary genomic**  
828 **province.** For most of the sites and across size fractions the future temperature projected by the  
829 bias adjusted ESM ensemble model is higher than both the maximum and mean contemporary  
830 temperature of their genomic province.

831

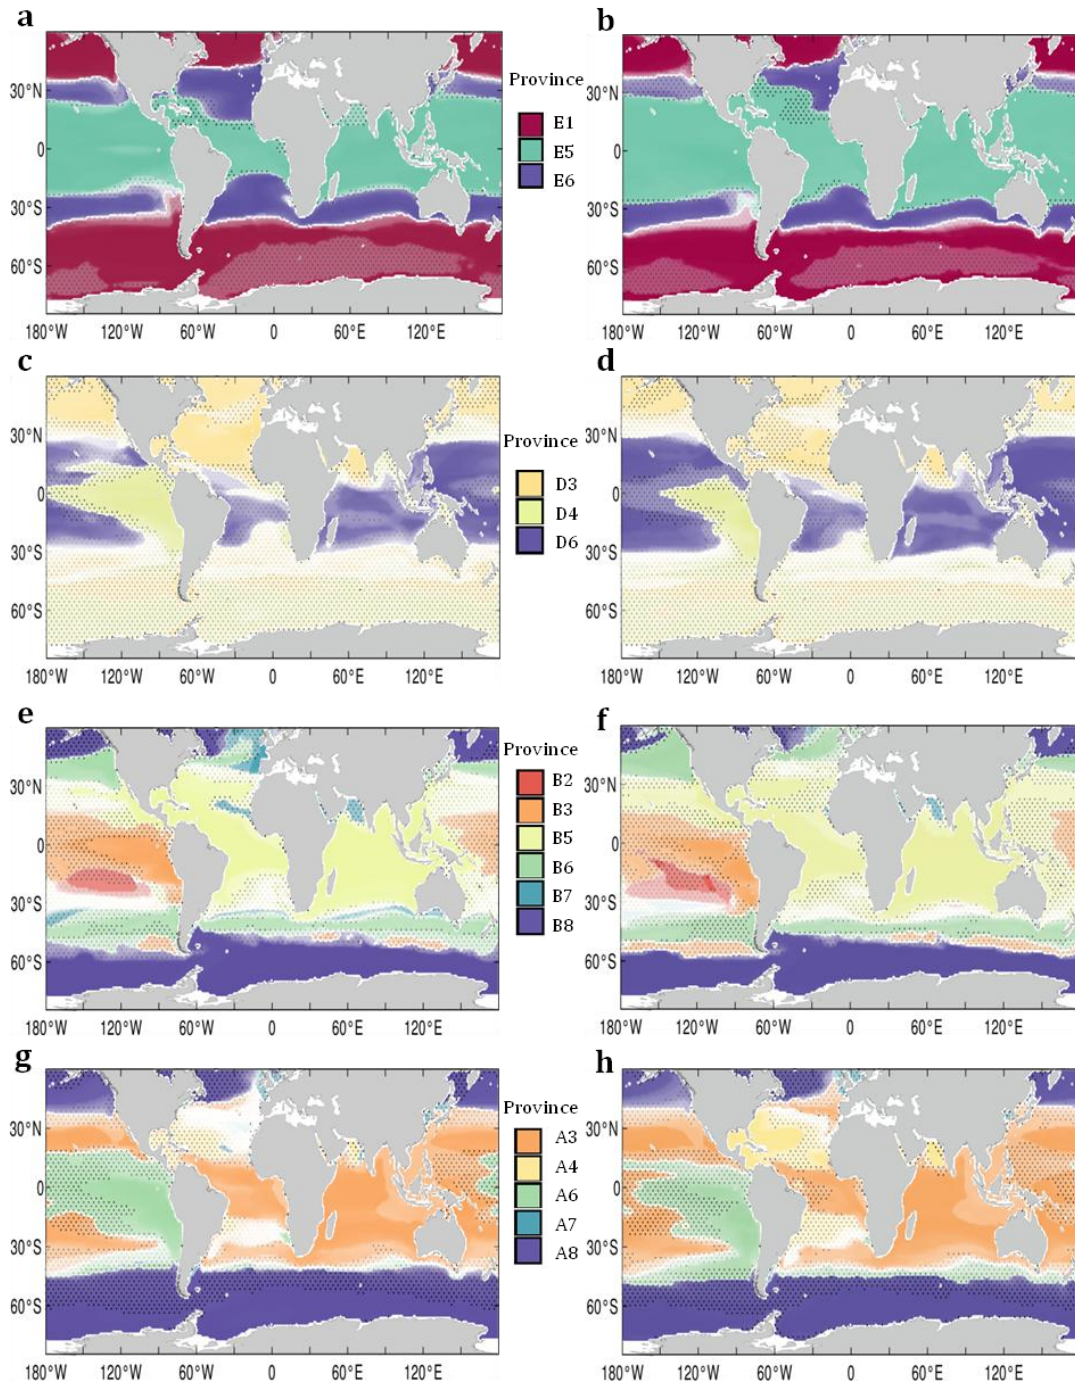

832 **Supplementary Fig. 13 | Global geographical patterns for 20-180, 5-20, 0.22-3, 0-0.2  $\mu$ m**  
833 **plankton size fractions in present day (a, c, e, g) and at the end of the century (b, d, f, h).** The  
834 dominant province *i.e.* the one predicted to have the highest probability of presence is represented  
835 at each grid point of the map. The color transparency is the probability of presence of the dominant  
836 province. Expansion of tropical provinces and shrinkage of temperate communities is consistently  
837 projected in all size fractions.

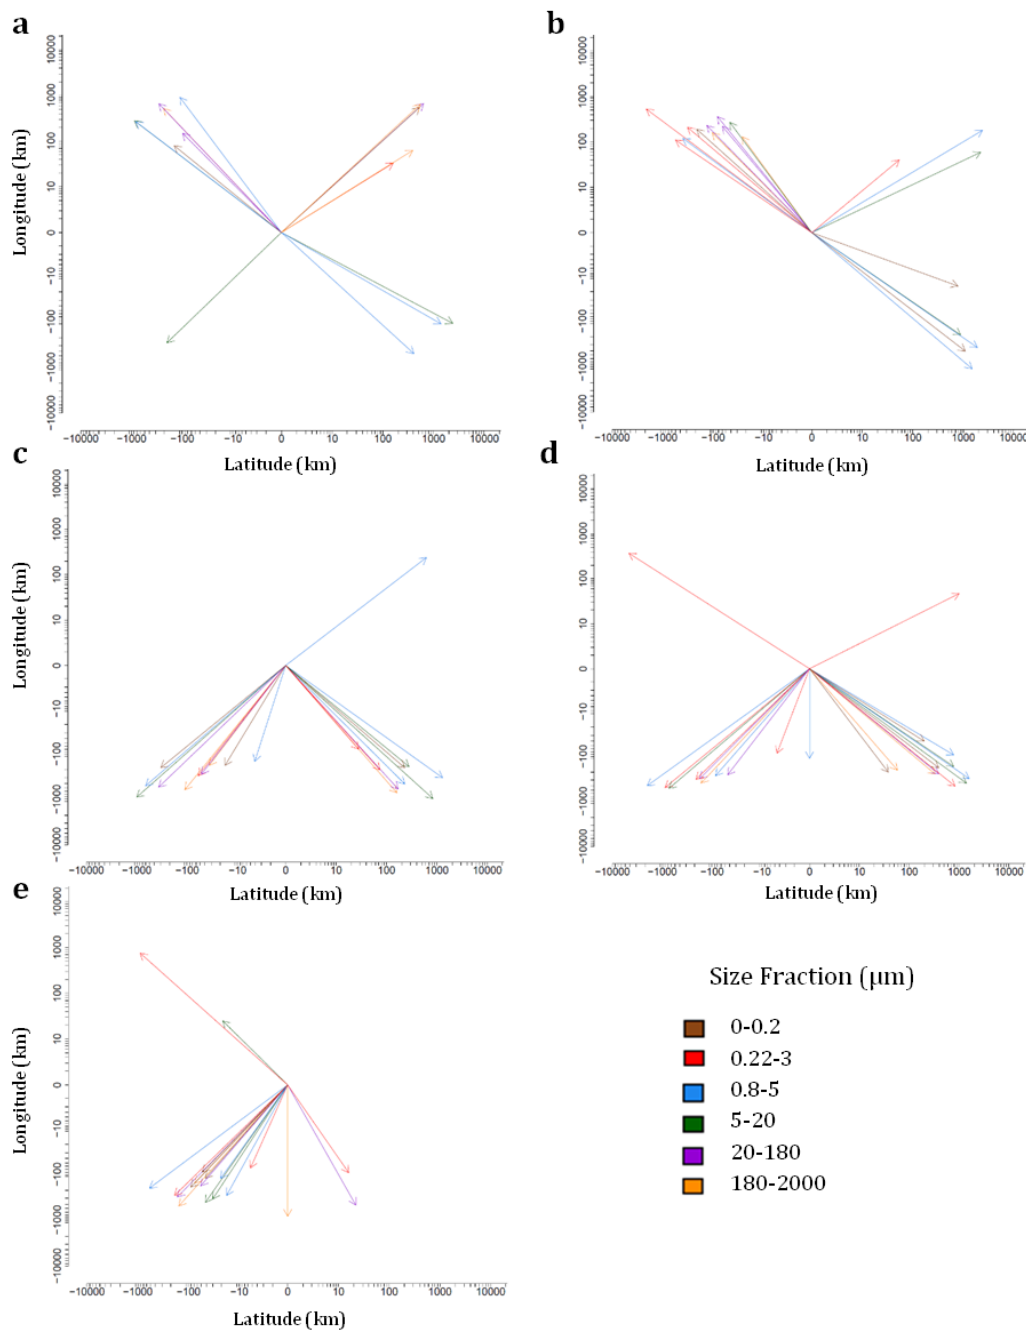

838 **Supplementary Fig. 14 | Projected migration shifts of the 27 provinces between present day**  
839 **and end of the century.** Predicted migration shifts are presented in 5 major ocean basins: (a)  
840 North Atlantic (b) North Pacific (c) South Atlantic (d) South Pacific and (e) Indian Ocean. 96 % of  
841 migration shifts (larger than 200 km) are oriented towards the pole. Mean shift is 641 km ( $76 \pm 79$   
842 km.dec<sup>-1</sup>) and median shift is 394 km (47 km.dec<sup>-1</sup>). Few provinces are projected to shift more than  
843 thousands of kilometers toward suitable environmental conditions with a maximum shift of 4325  
844 km.

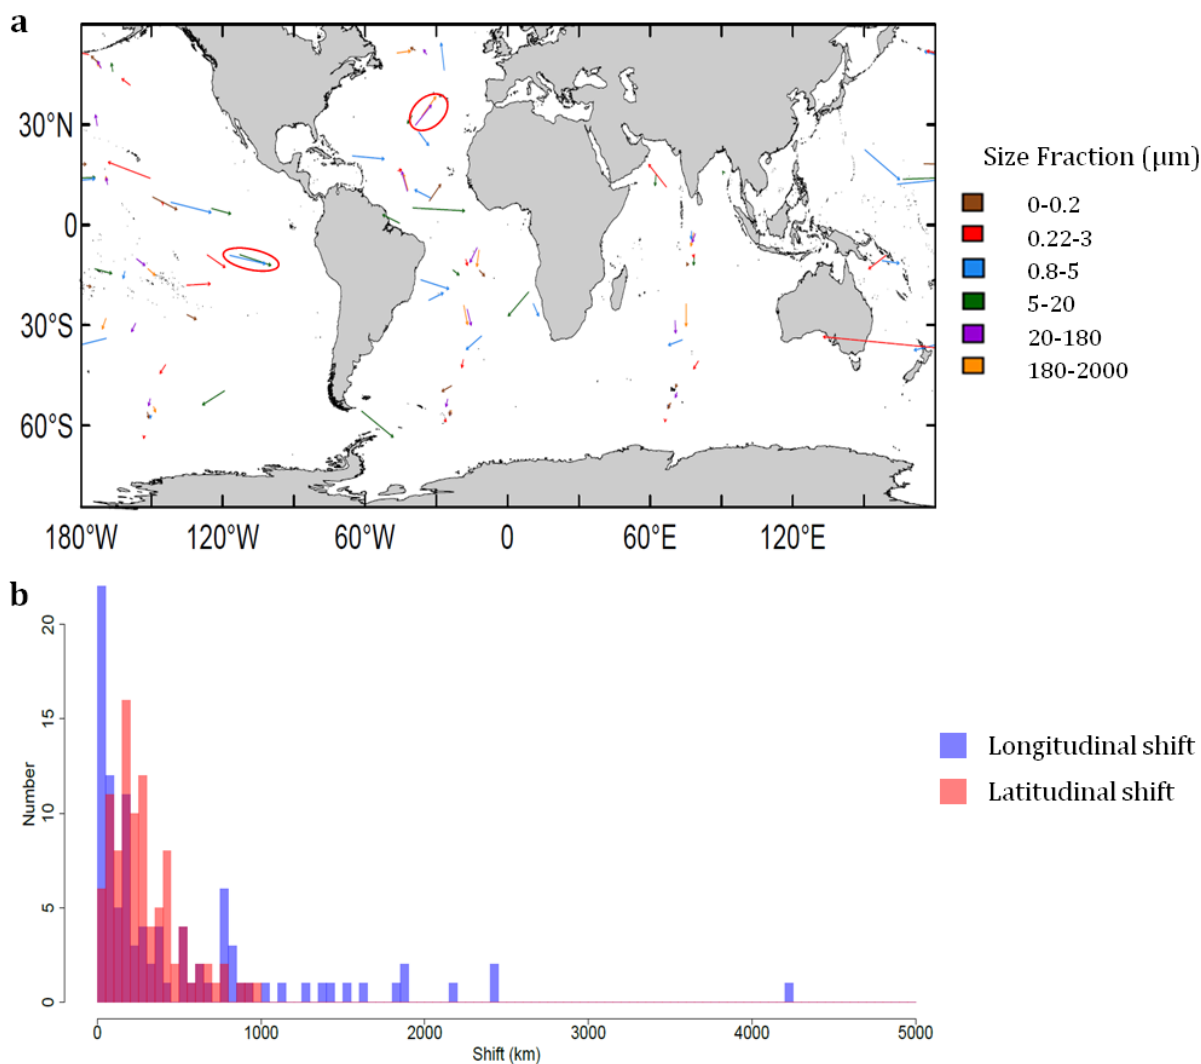

845 **Supplementary Fig. 15 | (a) Projected migration shifts of provinces on the world map. (b)**  
846 **Latitudinal shift distribution (red bars) and longitudinal shift distribution (blue bars).** (a)  
847 Migration shifts are represented as arrows pointing at the end of century centroid. Arrows are  
848 colored according to the size fraction. Some shifts seem to correlate with each other (exemplified  
849 with circled arrows). For instance, parallel shifts are projected in the southern pacific equatorial  
850 communities of size fractions 0.8-5  $\mu\text{m}$  and 5-20  $\mu\text{m}$  (blue and green circled arrows). All non-  
851 poleward arrows belong to small size classes (<20 $\mu\text{m}$ ) showing differential responses to climate  
852 change depending on the size class. (b) Some longitudinal shifts are more important than  
853 latitudinal shifts with 14 longitudinal shifts superior to 1000 kms. Mean longitudinal shift (around  
854 500 kms) is significantly higher (Student t-test p-value<0.01) than mean latitudinal shift (around  
855 290 kms) while medians (longitudinal 190 kms vs latitudinal 230 kms) are not significantly  
856 different (Wilcoxon test).

857



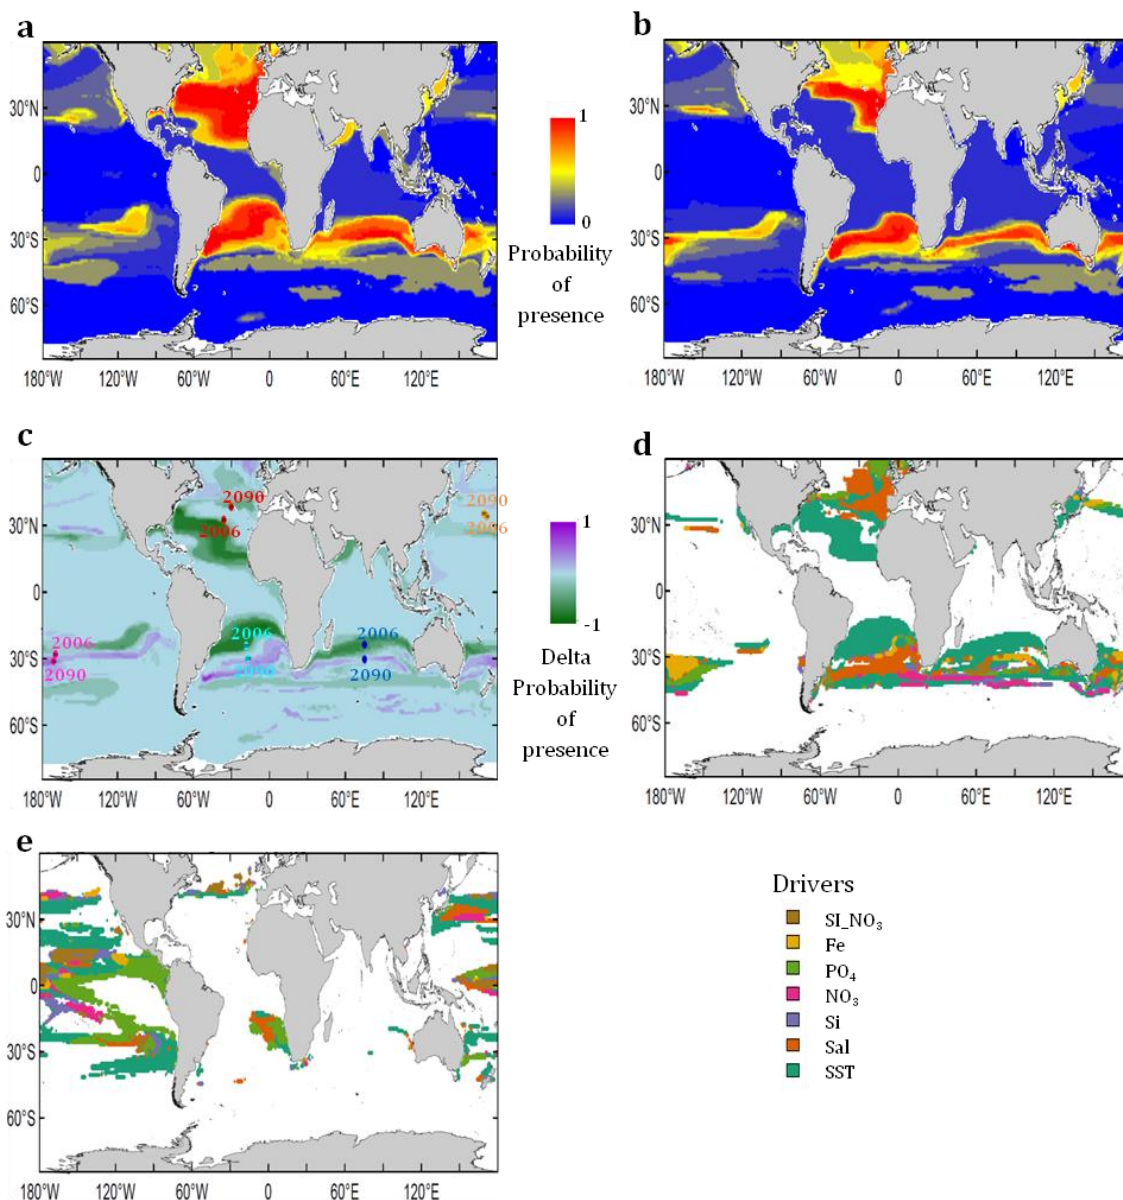

858 **Supplementary Fig. 16 | Projection maps of province F5 of size fraction 180-2000  $\mu\text{m}$  in**  
859 **present day (a) and at the end of the century (b).** At each grid point, the probability of presence  
860 of the province is computed as the average of the predicted probability of each of the four machine  
861 learning techniques (gbm, nn, rf and gam). Red color indicates a high probability of presence.  
862 (a) The projected province corresponds to the sampled province (North Atlantic and South Atlantic)  
863 but several other places have high probabilities of presence such as South Australia where no  
864 sampling is available. (b) At the end of the century, the province is projected to reduce significantly  
865 in size. (c) Delta probability of presence map (2006/15 - 2090/99) and core range shift in the 5  
866 major oceanic basins of province F5 of size fraction 180-2000  $\mu\text{m}$ . In all the basins, the centroid of  
867 the province is projected to migrate poleward. (d) Main drivers associated with the projected

868 changes. Changes are mainly driven by sea surface temperature (55%) followed by salinity (14%).  
869 (e) Main drivers associated with the shrinkage of the equatorial cluster C9 of size fraction 0.8-5.  
870 Considering only latitudes between the two tropics, changes are mainly driven by decreases in  $\text{PO}_4$   
871 (24 %) in addition to SST (27 %) (overall 34 % STT and 20 %  $\text{PO}_4$ ).  
872

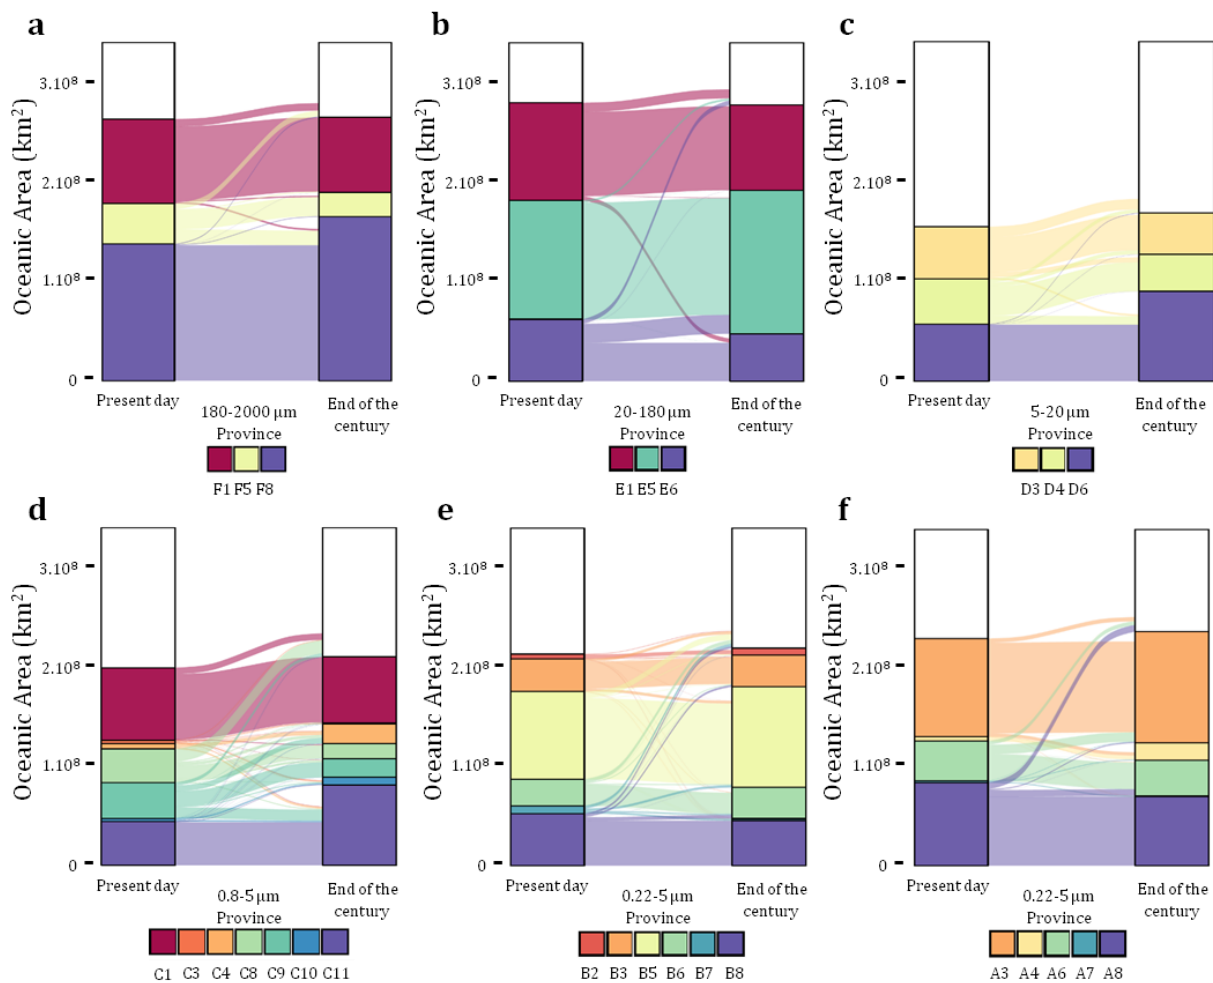

873 **Supplementary Fig. 17 | Probabilistic covered areas of the provinces projected in present**  
 874 **day and at the end of the century. (a) 180-2000 μm (b) 20-180 μm (c) 5-20 μm (d) 5-20 μm (e)**  
 875 **0.8-5 μm (f) 0-0.2 μm.** The covered area by a province is defined as the area in which this province  
 876 is dominant and weighted by its probability of presence at each point and grid cell area. Areas not  
 877 covered by the provinces are represented in white.

878

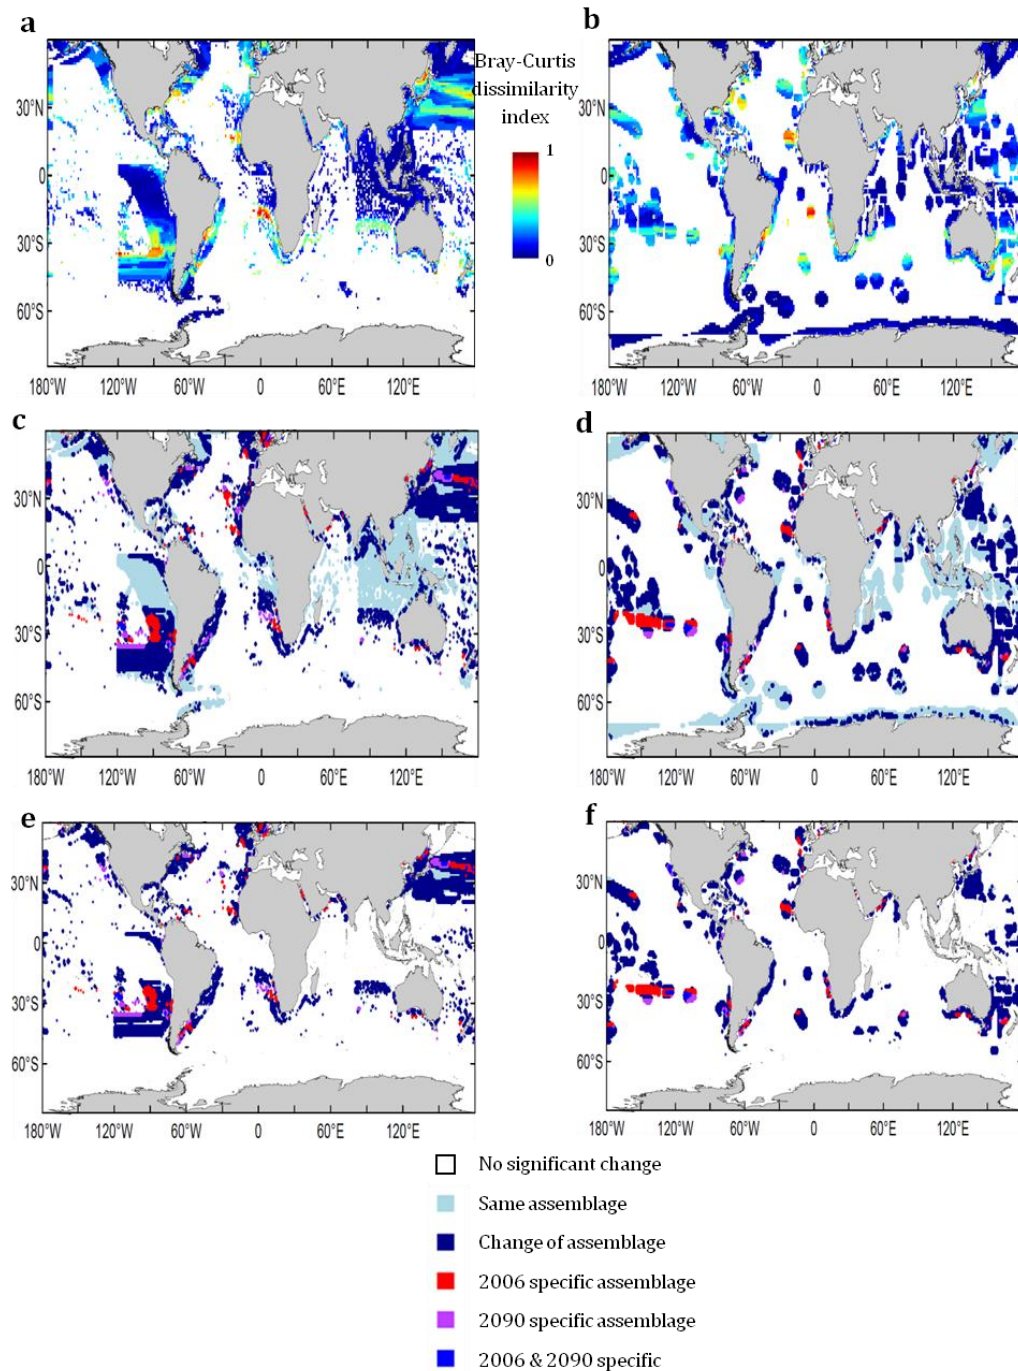

879 **Supplementary Fig. 18 | Bray-Curtis dissimilarity index and assemblage changes maps**  
880 **comparing present day with end of the century projections of *dominant* provinces in (a)**  
881 **principal fisheries (4 last deciles<sup>20</sup>) and (b) Exclusive Economic Zones<sup>21</sup>. Assemblage changes in (c)**  
882 **Principal fisheries (d) Exclusive Economic Zones. Assemblage changes in (e) Principal fisheries (f)**  
883 **Exclusive Economic Zones with a Bray-Curtis dissimilarity index superior to 1/6.**

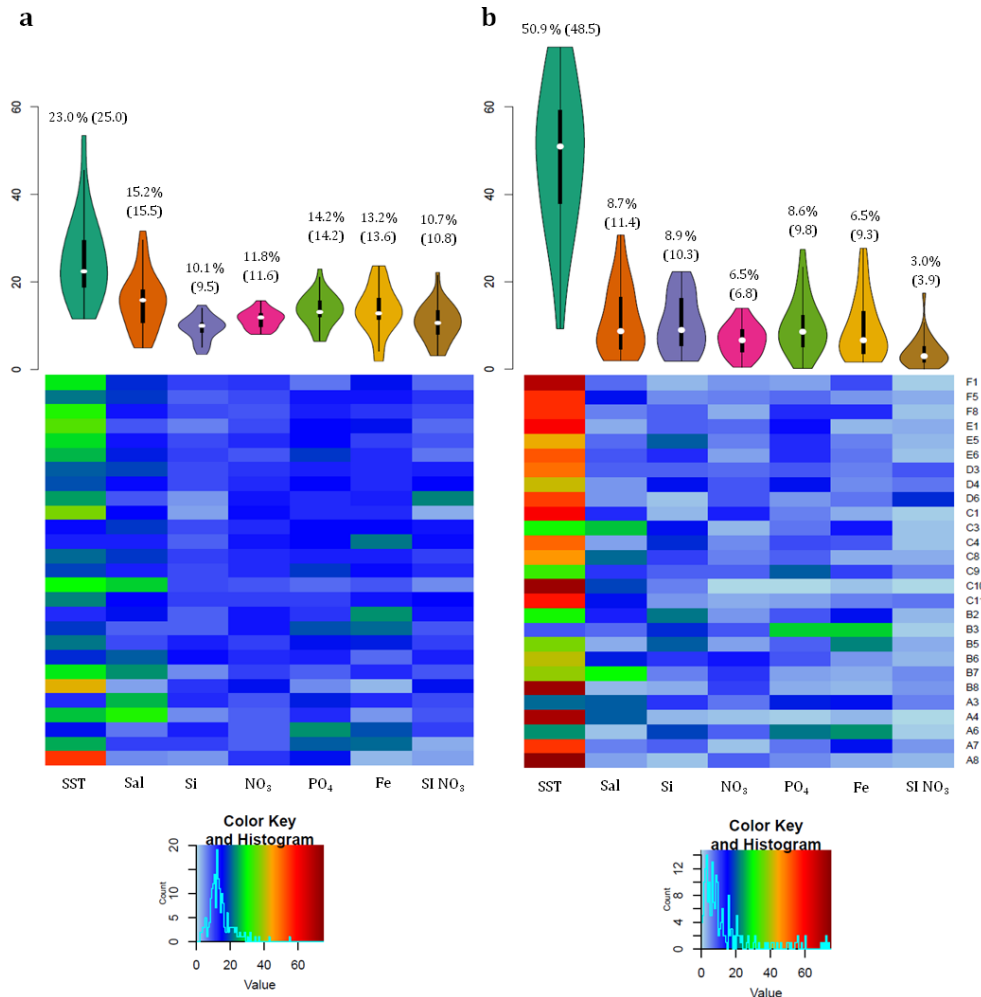

884 **Supplementary Fig. 19 | Distributions and heat maps of the relative influences of the**  
 885 **different drivers in (a) defining single niches associated to the provinces from DALEX R**  
 886 **package<sup>22</sup> (b) driving climate change associated reorganizations of single provinces.** Median  
 887 relative influence of Temperature is significantly higher than for all other environmental  
 888 parameters (Pairwise Wilcoxon test  $p < 0.01$  for all parameters) in (a) defining the niches and (b)  
 889 driving province reorganization. It is also the case within individual size fractions for (b) but not for  
 890 (a). Respectively, Salinity (Sal) and Phosphate (PO<sub>4</sub>), have second and third highest median relative  
 891 influences far behind Temperature whereas dissolved Silica and seasonality index of Nitrate (SI  
 892 NO<sub>3</sub>) have the lowest median relative importance in (a). Numbers above violins are median (and  
 893 mean) relative influences.

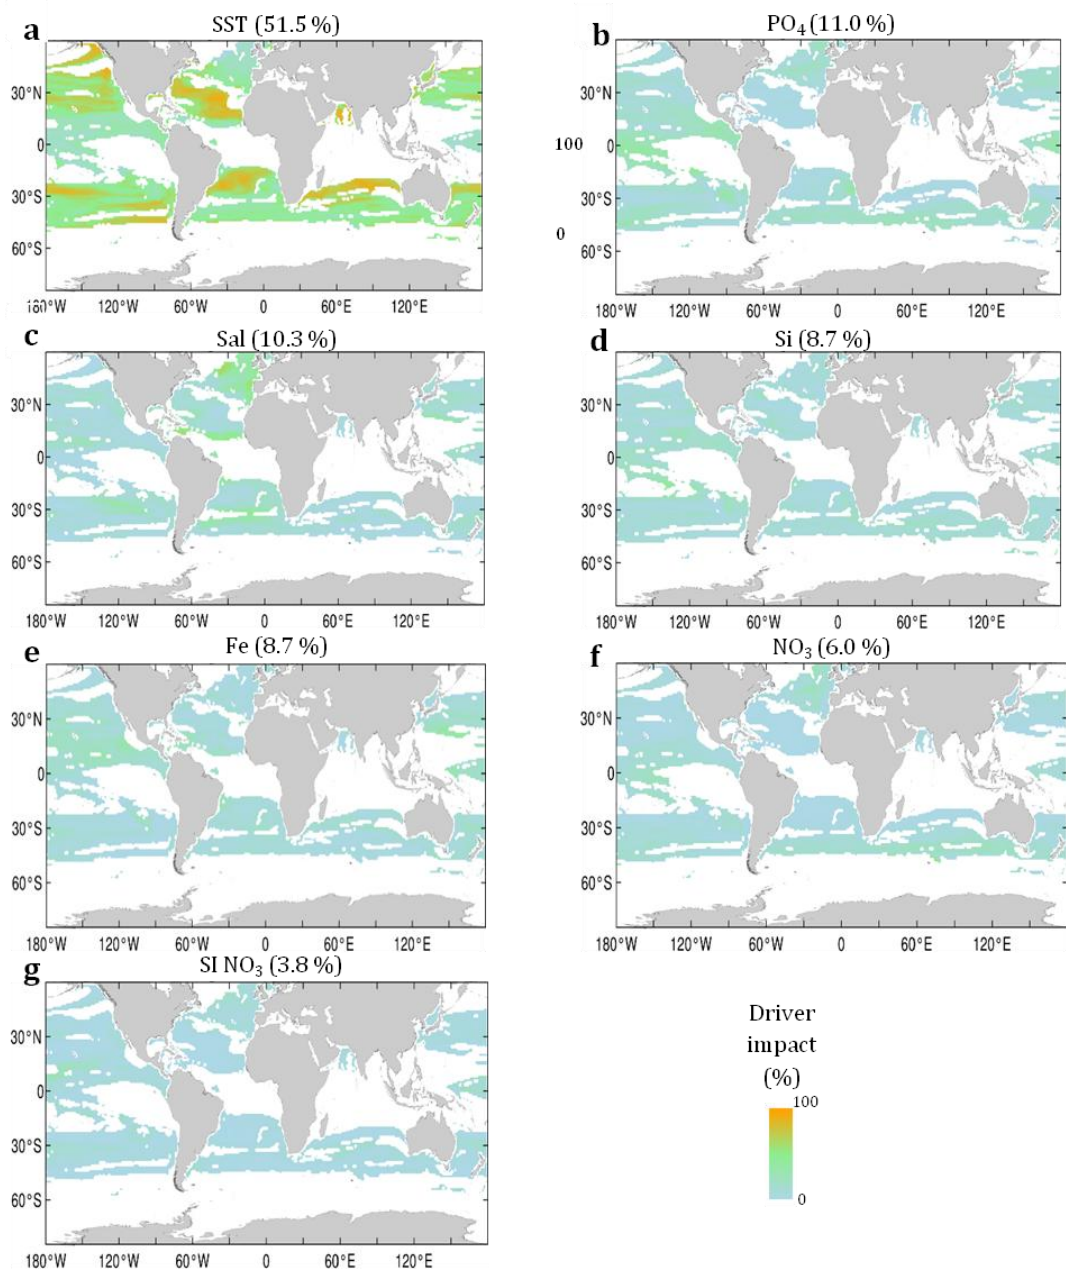

894 **Supplementary Fig. 20 | Maps of environmental drivers' relative influences in driving**  
895 **province reorganization.** Each environmental parameter relative influence is quantified by  
896 considering only the variation of each parameter individually between present day and end of the  
897 century as defined in Barton et al.<sup>23</sup> (*Materials and Methods*) and where a significant change is  
898 projected. Importantly the mean impact of SST (51.5 %) is largely the highest. PO<sub>4</sub> is the second  
899 most impacting drivers (11.0 %). Contrary to supplementary Fig. 16, relative influence is calculated  
900 here by combining all provinces together. Therefore, mean relative influences slightly differ  
901 especially for dissolved silica (Si).  
902

903

| <b>Model</b> | <b>Reference</b>       |
|--------------|------------------------|
| CESM1-BGC    | Gent et al., 2011      |
| GFDL-ESM2G   | Dunne et al., 2013     |
| GFDL-ESM2M   | Dunne et al., 2013     |
| HadGEM2-ES   | Collins et al., 2011   |
| IPSL-CM5A-LR | Dufresne et al., 2013  |
| IPSL-CM5A-MR | Dufresne et al., 2013  |
| MPI-ESM-LR   | Giorgetta et al., 2013 |
| MPI-ESM-MR   | Giorgetta et al., 2013 |
| NorESM1-ME   | Bentsen et al., 2013   |

904 **Supplementary Table 1 | Earth System models used to compute the mean model.**

905

906

| Fraction | Province | Climatic annotation | Area 2006-15 (MKm <sup>2</sup> ) | Area 2090-99 (MKm <sup>2</sup> ) | Delta area (MKm <sup>2</sup> (%)) |
|----------|----------|---------------------|----------------------------------|----------------------------------|-----------------------------------|
| 180-2000 | F1       | polar               | 82                               | 73                               | -9 (-11%)                         |
| 180-2000 | F5       | temperate           | 44                               | 26                               | -18 (-41%)                        |
| 180-2000 | F8       | tropico-equatorial  | 140                              | 169                              | 29 (+21%)                         |
| 20-180   | E1       | polar               | 97                               | 84                               | -13 (-13%)                        |
| 20-180   | E5       | tropico-equatorial  | 119                              | 145                              | +26 (+22%)                        |
| 20-180   | E6       | temperate           | 65                               | 49                               | 15 (-23%)                         |
| 5-20     | D3       | temperate           | 51                               | 41                               | -10 (-20%)                        |
| 5-20     | D4       | equatorial          | 46                               | 37                               | -8 (-18%)                         |
| 5-20     | D6       | tropical            | 65                               | 97                               | 32 (+48%)                         |
| 0.8-5    | C1       | polar               | 71                               | 64                               | -6 (-8%)                          |
| 0.8-5    | C3       | subtropical         | 3,6                              | 1,4                              | -2,2 (-61%)                       |
| 0.8-5    | C4       | subtropical         | 6                                | 19                               | +13 (+217%)                       |
| 0.8-5    | C8       | temperate           | 33                               | 15                               | -18 (-54%)                        |
| 0.8-5    | C9       | equatorial          | 35                               | 19                               | -16 (-45%)                        |
| 0.8-5    | C10      | subtropical         | 3.8                              | 7.4                              | +3,6 (+95%)                       |
| 0.8-5    | C11      | tropical            | 49                               | 86                               | 37 (+75%)                         |
| 0.22-3   | B2       | subtropical         | 5,1                              | 6,7                              | +1,6 (+31 %)                      |
| 0.22-3   | B3       | equatorial          | 33                               | 32                               | -1 (-0.3%)                        |
| 0.22-3   | B5       | tropical            | 88                               | 102                              | +13 (+15%)                        |
| 0.22-3   | B6       | temperate           | 30                               | 35                               | +5 (+17%)                         |
| 0.22-3   | B7       | temperate           | 8                                | 2                                | -6 (-75%)                         |
| 0.22-3   | B8       | polar               | 51                               | 44                               | -7 (-14%)                         |
| 0-0.2    | A3       | tropical            | 101                              | 114                              | +13 (+13 %)                       |
| 0-0.2    | A4       | subtropical         | 6                                | 19                               | +13 (+216 %)                      |
| 0-0.2    | A6       | equatorial          | 40                               | 36                               | -4 (-10%)                         |
| 0-0.2    | A7       | temperate           | 1,7                              | 1                                | -0,7 (-41%)                       |
| 0-0.2    | A8       | polar               | 81                               | 67                               | -14 (-17%)                        |

907 **Supplementary Table 2 | Genomic provinces climatic annotations and oceanic surfaces they**  
 908 **cover in present day (2006-15) and at the end of the century (2090-990).**

909



910

|                             | <b>Fraction<br/>(<math>\mu</math>m)</b> | <b>SST</b> | <b>Sal</b> | <b>Si</b> | <b>NO3</b> | <b>PO4</b> | <b>Fe</b> | <b>SI NO3</b> |
|-----------------------------|-----------------------------------------|------------|------------|-----------|------------|------------|-----------|---------------|
| <b>Niche<br/>definition</b> | 180-2000                                | 27,7       | 16,8       | 10,1      | 10,3       | 11,4       | 14        | 9,7           |
|                             | 20-180                                  | 29,7       | 13,3       | 8,9       | 10,7       | 16,3       | 13,2      | 7,9           |
|                             | 5-20                                    | 21,5       | 14,2       | 8,4       | 12,7       | 13,7       | 12,6      | 17            |
|                             | 0,8-5                                   | 22,6       | 17,3       | 9,2       | 12,3       | 13,4       | 14,5      | 10,8          |
|                             | 0,22-3                                  | 23,9       | 13,7       | 10,5      | 13         | 12,5       | 14,2      | 12,2          |
|                             | 0-0,2                                   | 27,1       | 16,4       | 9,3       | 9,5        | 17,9       | 12,1      | 7,6           |
|                             | all                                     | 25         | 15,5       | 9,5       | 11,6       | 14,2       | 13,6      | 10,8          |
| <b>Climate<br/>change</b>   | 180-2000                                | 75,2       | 8,4        | 2,5       | 2,6        | 4,1        | 5,8       | 1,4           |
|                             | 20-180                                  | 71,7       | 4,2        | 7,3       | 3,9        | 8,7        | 3,3       | 1,0           |
|                             | 5-20                                    | 57,9       | 6,1        | 4,4       | 6,6        | 9,0        | 6,5       | 1,0           |
|                             | 0,8-5                                   | 54,9       | 13,4       | 7,2       | 5,5        | 9,7        | 5,9       | 3,6           |
|                             | 0,22-3                                  | 42,6       | 9,9        | 13,5      | 6,4        | 9,1        | 15,2      | 3,3           |
|                             | 0-0,2                                   | 42,3       | 18,9       | 6,6       | 6,4        | 12,1       | 10,8      | 2,9           |
|                             | all                                     | 51,5       | 10,3       | 8,7       | 6          | 11         | 8,7       | 3,8           |

911 **Supplementary Table 3 | Summary table of relative importance of each environmental**  
 912 **driver in niche definition and in driving geographical reorganization in response to climate**  
 913 **change.** Note that in both cases (niche definition and climate change), the row 'all' is not the mean  
 914 over the size fractions. In the case of niche definition, this is due to a different number of niches in  
 915 each size class. In the case of climate change, relative influence is either calculated for single  
 916 provinces at a given grid point then recalculated for individual size class or calculated for all  
 917 provinces together (row 'all').

918

## 919 **References**

- 920 1. Boyer, T. P. et al. WORLD OCEAN DATABASE 2013, NOAA Atlas NESDIS 72. Sydney Levitus,  
921 Ed.; Alexey Mishonoc, Tech. Ed. (2013). doi:10.7289/V5NZ85MT
- 922 2. Gent, P. R. et al. The community climate system model version 4. *J. Clim.* (2011).  
923 doi:10.1175/2011JCLI4083.1
- 924 3. Dunne, J. P. et al. GFDL's ESM2 global coupled climate-carbon earth system models. Part II:  
925 Carbon system formulation and baseline simulation characteristics. *J. Clim.* (2013).  
926 doi:10.1175/JCLI-D-12-00150.1
- 927 4. Collins, W. J. et al. Development and evaluation of an Earth-System model - HadGEM2.  
928 *Geosci. Model Dev.* (2011). doi:10.5194/gmd-4-1051-2011
- 929 5. Dufresne, J. L. et al. Climate change projections using the IPSL-CM5 Earth System Model:  
930 From CMIP3 to CMIP5. *Clim. Dyn.* (2013). doi:10.1007/s00382-012-1636-1
- 931 6. Giorgetta, M. A. et al. Climate and carbon cycle changes from 1850 to 2100 in MPI-ESM  
932 simulations for the Coupled Model Intercomparison Project phase 5. *J. Adv. Model. Earth Syst.*  
933 (2013). doi:10.1002/jame.20038
- 934 7. Bentsen, M. et al. The Norwegian Earth System Model, NorESM1-M – Part 1: Description and  
935 basic evaluation of the physical climate. *Geosci. Model Dev.* (2013). doi:10.5194/gmd-6-687-2013
- 936 8. van Vuuren, D. P. et al. The representative concentration pathways: An overview. *Clim.*  
937 *Change* (2011). doi:10.1007/s10584-011-0148-z
- 938 9. Fawcett, T. An introduction to ROC analysis. *Pattern Recognit. Lett.* (2006).  
939 doi:10.1016/j.patrec.2005.10.010
- 940 10. Wood, S. N. Stable and efficient multiple smoothing parameter estimation for generalized  
941 additive models. *J. Am. Stat. Assoc.* (2004). doi:10.1198/016214504000000980
- 942 11. Ridgeway, G. gbm: Generalized Boosted Regression Models. R Packag. version 1.6-3.1  
943 (2010).
- 944 12. Venables, W. N. & Ripley, B. D. *Modern Applied Statistics with S* Fourth edition by. World  
945 (2002). doi:10.2307/2685660
- 946 13. Breiman, L. & Cutler, A. Breiman and Cutler's random forests for classification and  
947 regression. Packag. 'randomForest' (2012). doi:10.5244/C.22.54

- 948 14. Jaccard, P. Distribution comparée de la flore alpine dans quelques régions des Alpes  
949 occidentales et orientales. Bull. la Murithienne (1902).
- 950 15. Delmont, T. O. et al. Nitrogen-fixing populations of Planctomycetes and Proteobacteria are  
951 abundant in surface ocean metagenomes. Nat. Microbiol. (2018). doi:10.1038/s41564-018-0176-9
- 952 16. Aumont, O., Ethé, C., Tagliabue, A., Bopp, L. & Gehlen, M. PISCES-v2: An ocean  
953 biogeochemical model for carbon and ecosystem studies. Geosci. Model Dev. (2015).  
954 doi:10.5194/gmd-8-2465-2015
- 955 17. Reygondeau, G. et al. Dynamic biogeochemical provinces in the global ocean. Global  
956 Biogeochem. Cycles (2013). doi:10.1002/gbc.20089
- 957 18. Fay, A. R. & McKinley, G. A. Global open-ocean biomes: Mean and temporal variability. Earth  
958 Syst. Sci. Data (2014). doi:10.5194/essd-6-273-2014
- 959 19. Michelangeli, P. A., Vrac, M. & Loukos, H. Probabilistic downscaling approaches: Application  
960 to wind cumulative distribution functions. Geophys. Res. Lett. (2009). doi:10.1029/2009GL038401
- 961 20. Watson, R. A. A database of global marine commercial, small-scale, illegal and unreported  
962 fisheries catch 1950-2014. Sci. Data (2017). doi:10.1038/sdata.2017.39
- 963 21. Flanders Marine Institute (2018). Maritime Boundaries Geodatabase: Maritime Boundaries  
964 and Exclusive Economic Zones (200NM), version 10. (2018). doi:<https://doi.org/10.14284/313>.
- 965 22. Biecek, P. DALEX: explainers for complex predictive models. J. Mach. Learn. Res. 19, 1–5  
966 (2018).
- 967 23. Barton, A. D., Irwin, A. J., Finkel, Z. V. & Stock, C. A. Anthropogenic climate change drives shift  
968 and shuffle in North Atlantic phytoplankton communities. Proc. Natl. Acad. Sci. (2016).  
969 doi:10.1073/pnas.1519080113
